# Supplementary material
Source: publisher figshare collection journal article supplement (https://future-science-group.figshare.com/ndownloader/files/34796884)
Supplement: Supplementary file 1 [file 34796884]

**Supplementary table 1:** Plasma samples from 22 Caucasian individuals.

|  | **Cases** | **Controls** |
| --- | --- | --- |
| Diagnosis | Alzheimer' s Disease | Healthy Donor |
| Gender | 5 females; 3 males | 8 females; 6 males |
| Age | 75.2 +/- 9.8 | 59.7 +/- 11.2 |
| MMSE Score | 23.3 +/- 3.4 | 28.8 +/- 0.7 |

**Supplementary table 2 :** Custom gene panel of our targeted bisulfite sequencing protocol. DMCs and/or DMRs were identified in the literature from brain, blood or plasma samples of AD compared to control and were identified in brain-specific.

| **Study** | **Sample** | **Methylated gene** | **Reference** |
| --- | --- | --- | --- |
| Alzheimer's disease | Cortex | *TNFA* | [1] |
| Alzheimer's disease | Frontal cortex | *TMEM59* | [2] |
| Alzheimer's disease | Frontal cortex | *BDNF, COX2, CREB1, NFKB, SYP* | [3] |
| Alzheimer's disease | Frontal cortex | *SORBS3, SPTBN4, DUSP22, QSCN6* | [4] |
| Alzheimer's disease | Hippocampus | *APOE* | [5, 6] |
| Alzheimer's disease | Hippocampus | *GPM6B* | [7] |
| Alzheimer's disease | Pre-frontal cortex | *ABCA7, ANK1, BIN1, C10orf105, CDH23, IER3, RHBDF2, TREM2* | [8] |
| Alzheimer's disease | Pre-frontal cortex | *NGFR* | [9] |
| Alzheimer's disease | Pre-frontal cortex | *ANK1, MIR486, RHBDF2* | [10] |
| Alzheimer's disease | Pyramidal layers in frontal cortex | *MBP* | [11] |
| Alzheimer's disease | Superior temporal gyrus | *TREM2* | [12] |
| Alzheimer's disease | Superior temporal gyrus | *AGPAT1, B3GALT4, CMYA5, DUSP6, ELOVL1, FBRSL1, FLOT1, HLA-J, KIF25, KLK7, MOV10L1, NAV2, NRG2, PPT2, PPT2-EGFL8, PRDM16, PRRT1, RIBC2, RNF39, RNF5P1, TAP2, TBX15, TNXB, TRIM40, TRIM6, VAX2, ZNF177, ZNF559-ZNF177, ZNRD1-AS1* | [13] |
| Alzheimer's disease | Temporal cortex | *APP, MAPT* | [14] |
| Alzheimer's disease | Temporal lobe cortex | *S100A2, SORBS3* | [15] |
| Alzheimer's disease | Plasma | *LHX2* | [16] |
| Alzheimer's disease | Leucocytes | *FAAH* | [17] |
| Alzheimer's disease | Leucocytes | *ALOX5, SIRT1* | [18] |
| Alzheimer's disease | Leucocytes | *SCNA* | [19] |
| Alzheimer's disease | Lymphocytes | *APP, PS1* | [20] |
| Alzheimer's disease | Lymphocytes | *DR4* | [21] |
| Alzheimer's disease | Mononuclear cells | *ALOX5* | [22] |
| Alzheimer's disease | Mononuclear cells | *BDNF* | [23] |
| Alzheimer's disease | Whole Blood | *DUSP22, FLOT1, B3GALT4, DRD4* | [24] |
| Alzheimer's disease | Whole Blood | *PIN1* | [25] |
| Alzheimer's disease | Whole Blood | *BDNF* | [26] |
| Alzheimer's disease | Whole Blood | *DRD4* | [27] |
| Alzheimer's disease | Whole Blood | *OPRD1* | [28] |
| Alzheimer's disease | Whole Blood | *CNPY1* | [29] |
| Alzheimer's disease | Whole Blood | *DAPK1, GAS1, NDUFS5* | [10] |
| Alzheimer's disease | Whole Blood | *HMOX1* | [30] |
| Brain-specific | Frontal Cortex | *EOMES, SLITRK1, GRM4, SHANK3, JAKMIP1, PPP2R2B, SLITRK1, CACNA1A, SLIT1, BMP4, NUMBL, PCDH9* | [31] |
| Brain-specific | Frontal Cortex | *KIF19* | [32] |

**Supplementary table 3 :** Tissue specificity of genes (RNA and protein expression) in the targeted-bisulfite capture gene panel according to the Protein Atlas Database. Genes with an "enriched" expression in a tissue show at least four-fold higher mRNA level compared to any other tissue. Genes with an "enhanced" expression mean that there is at least four-fold higher mRNA level in a tissue compared to the average level in all other tissues.

| **Gene** | **Tissue specificity  (RNA expression)** | **Brain specificity  (RNA expression)** | **Reliabilty  (protein expression)** |
| --- | --- | --- | --- |
| *MBP* | Tissue enriched (brain) | Low human brain regional specificity | Enhanced |
| *CACNA1A* | Tissue enriched (brain) | Human brain regional enriched (cerebellum) | Enhanced |
| *OPRD1* | Tissue enriched (brain) | Low human brain regional specificity | Approved |
| *PPP2R2B* | Tissue enriched (brain) | Low human brain regional specificity | Approved |
| *GRM4* | Tissue enriched (brain) | Human brain regional enriched (cerebellum) | Enhanced |
| *PRRT1* | Tissue enriched (brain) | Low human brain regional specificity | Enhanced |
| *CRTC1* | Tissue enhanced (brain) | Low human brain regional specificity | Enhanced |
| *SPTBN4* | Tissue enhanced (brain) | Low human brain regional specificity | Enhanced |
| *SLIT1* | Tissue enhanced (brain) | Low human brain regional specificity |  |
| *SHANK3* | Tissue enhanced (brain) | Low human brain regional specificity | Enhanced |
| *SLITRK1* | Tissue enhanced (brain) | Low human brain regional specificity | Enhanced |
| *ELOVL1* | Tissue enhanced (brain) | Low human brain regional specificity | Supported |
| *SNCA* | Group enriched (blood, bone marrow, brain) | Low human brain regional specificity | Enhanced |
| *PCDH9* | Group enriched (blood, brain) | Low human brain regional specificity |  |
| *CNPY1* | Group enriched (brain, pancreas) | Human brain regional enriched (cerebellum) | Uncertain |
| *LHX2* | Group enriched (brain, retina) | Group enriched (amygdala, basal ganglia, cerebral cortex, hippocampal formation, olfactory human brain regional) |  |
| *MAPT* | Group enriched (brain, skeletal muscle) | Low human brain regional specificity | Enhanced |
| *JAKMIP1* | Tissue enhanced (blood, brain) | Low human brain regional specificity | Uncertain |
| *EOMES* | Tissue enhanced (blood, brain, lymphoid tissue) | Human brain regional enriched (cerebellum) | Uncertain |
| *TNF* | Tissue enhanced (bone marrow, lymphoid tissue) | Low human brain regional specificity | Supported |
| *KIF19* | Tissue enhanced (brain, fallopian tube) | Low human brain regional specificity | Enhanced |
| *RIBC2* | Tissue enhanced (brain, fallopian tube, testis) |  | Approved |
| *C10orf105* | Tissue enhanced (brain, lymphoid tissue) | Low human brain regional specificity | Pending |
| *VAX2* | Tissue enhanced (brain, retina) | Human brain regional enhanced (cerebellum) |  |
| *BDNF* | Tissue enhanced (brain, smooth muscle) | Low human brain regional specificity | Enhanced |
| *KIF25* | Tissue enhanced (adipose tissue, brain) |  | Uncertain |
| *TREM2* | Tissue enhanced (adipose tissue, brain, lung) | Low human brain regional specificity | Approved |
| *PTGS2* | Group enriched (ductus deferens, seminal vesicle) | Low human brain regional specificity | Enhanced |
| *KLK7* | Group enriched (esophagus, skin, tongue) | Low human brain regional specificity | Enhanced |
| *S100A2* | Group enriched (esophagus, tongue) | Not detected in human brain | Enhanced |
| *TRIM40* | Group enriched (intestine, placenta) | Not detected in human brain | Uncertain |
| *ANK1* | Group enriched (skeletal muscle, tongue) | Human brain regional enhanced (cerebellum) | Supported |
| *ALOX5* | Tissue enhanced (blood, bone marrow, lymphoid tissue) | Low human brain regional specificity | Enhanced |
| *DUSP6* | Tissue enhanced (blood) | Low human brain regional specificity | Approved |
| *RNF39* | Tissue enhanced (esophagus, skin) | Not detected in human brain | Uncertain |
| *TBX15* | Tissue enhanced (liver, skeletal muscle, tongue) | Low human brain regional specificity | Uncertain |
| *CMYA5* | Cell type enriched (Cardiomyocytes) | Not detected in human brain | Enhanced |
| *DRD4* | Tissue enriched (retina) | Low human brain regional specificity |  |
| *BIN1* | Tissue enriched (skeletal muscle) | Low human brain regional specificity | Enhanced |
| *MOV10L1* | Tissue enriched (testis) | Low human brain regional specificity | Approved |
| *GAS1* | Tissue enhanced (endometrium) | Low human brain regional specificity | Approved |
| *NAV2* | Tissue enhanced (heart muscle) | Tissue enhanced (heart muscle) | Approved |
| *TRIM6* | Tissue enhanced (kidney) | Low human brain regional specificity | Uncertain |
| *HMOX1* | Tissue enhanced (lymphoid tissue) | Low human brain regional specificity | Enhanced |
| *QSOX1* | Tissue enhanced (placenta) | Low human brain regional specificity |  |
| *DAPK1* | Tissue enhanced (placenta) | Low human brain regional specificity | Approved |
| *CDH23* | Tissue enhanced (retina) | Low human brain regional specificity | Approved |
| *BMP4* | Tissue enhanced (retina) | Low human brain regional specificity | Uncertain |
| *IER3* | Tissue enhanced (seminal vesicle) | Low human brain regional specificity | Approved |
| *ZNF177* | Tissue enhanced (testis) | Low human brain regional specificity | Uncertain |
| *FBRSL1* | Low tissue specificity | Low human brain regional specificity | Enhanced |
| *DUSP22* | Low tissue specificity | Low human brain regional specificity | Approved |
| *TNXB* | Low tissue specificity | Human brain regional enhanced (cerebellum) |  |
| *NUMBL* | Low tissue specificity | Low human brain regional specificity | Approved |
| *APP* | Low tissue specificity | Low human brain regional specificity | Enhanced |
| *FAAH* | Low tissue specificity | Low human brain regional specificity | Approved |
| *ZNRD1-AS1* | Low tissue specificity | Low human brain regional specificity | Supported |
| *PRDM16* | Low tissue specificity | Low human brain regional specificity |  |
| *RHBDF2* | Low tissue specificity | Low human brain regional specificity | Uncertain |
| *TAP2* | Low tissue specificity | Low human brain regional specificity | Approved |
| *ABCA7* | Low tissue specificity | Low human brain regional specificity | Enhanced |
| *HLA-J* | Low tissue specificity | Low human brain regional specificity |  |
| *B3GALT4* | Low tissue specificity | Low human brain regional specificity | Approved |
| *NDUFS5* | Low tissue specificity | Low human brain regional specificity | Supported |
| *NGFR* | Low tissue specificity | Low human brain regional specificity | Enhanced |
| *NFKB1* | Low tissue specificity | Low human brain regional specificity | Enhanced |
| *PSEN1* | Low tissue specificity | Low human brain regional specificity | Approved |
| *AGPAT1* | Low tissue specificity | Low human brain regional specificity | Approved |
| *CREB1* | Low tissue specificity | Low human brain regional specificity | Supported |
| *FLOT1* | Low tissue specificity | Low human brain regional specificity | Enhanced |
| *SORBS3* | Low tissue specificity | Low human brain regional specificity | Approved |
| *MIR486* |  |  |  |
| *PPT2-EGFL8* |  |  |  |
| *RNF5P1* |  |  |  |

**Supplementary table 4 :** 632 DMCs in ccfDNA from plasma (q-value ≤0.05, Methylation change >5%)

| **CpG coordinate** | **Gene** | **Gene  annotation** | **CpG  site** | **DMC  (%)** | **q-value** | **Mean case  Methylation (%)** | **Mean control  Methylation (%)** |
| --- | --- | --- | --- | --- | --- | --- | --- |
| chr19:1052085 | ABCA7 | promoter | shores | 6.35 | 7.20E-10 | 92.43+/-4.37 | 88.75+/-12.53 |
| chr19:1052005 | ABCA7 | exon, CDS | shores | -9.50 | 2.63E-04 | 53.6+/-35.63 | 70.5+/-28.79 |
| chr19:1039774 | ABCA7 | promoter | islands | 8.36 | 2.28E-02 | 25.28+/-7.81 | 21.67+/-11.07 |
| chr19:1047323 | ABCA7 | exon | islands | 10.42 | 3.62E-02 | 50.99+/-10.73 | 41.27+/-12.28 |
| chr6:32138008 | AGPAT1/PPT2-EGFL8 | exon/intron | shelves | -5.31 | 9.47E-03 | 84.91+/-3.73 | 88.01+/-4.01 |
| chr10:45941405 | ALOX5 | exon, UTR | shores | 8.92 | 1.04E-47 | 89.85+/-4.39 | 81.48+/-16.5 |
| chr10:45941051 | ALOX5 | exon, CDS | shores | 7.32 | 2.48E-03 | 79.02+/-7.05 | 76.4+/-6.09 |
| chr10:45868339 | ALOX5 | promoter | shores | 5.94 | 5.52E-03 | 70.43+/-9.59 | 68.21+/-7.31 |
| chr10:45920551 | ALOX5 | exon | shelves | 10.21 | 2.93E-02 | 31.12+/-14.43 | 24.9+/-10.4 |
| chr8:41554011 | ANK1 | promoter | inter | 6.68 | 4.29E-22 | 98.02+/-1.15 | 93.63+/-12.54 |
| chr8:41547841 | ANK1 | promoter | inter | -9.12 | 2.80E-17 | 86.11+/-20.46 | 94.76+/-2.56 |
| chr8:41518719 | ANK1 | exon | inter | -16.99 | 6.13E-05 | 35.96+/-7.61 | 47.05+/-10.63 |
| chr8:41563684 | ANK1 | exon, CDS | inter | -12.78 | 3.82E-04 | 72.99+/-35.52 | 76.64+/-23.19 |
| chr8:41529993 | ANK1 | exon, UTR | inter | 5.50 | 4.47E-03 | 94.34+/-3.42 | 87.62+/-12.55 |
| chr8:41518715 | ANK1 | exon | inter | -12.40 | 1.09E-02 | 23.33+/-8.91 | 31.54+/-9.98 |
| chr8:41517216 | ANK1/MIR486 | intron/promoter | inter | -17.08 | 6.54E-07 | 85.93+/-17.17 | 93.26+/-5.63 |
| chr8:41516990 | ANK1/MIR486 | intron/promoter | inter | 13.45 | 5.10E-03 | 74.72+/-22.49 | 71.4+/-35.89 |
| chr21:27253112 | APP | exon, UTR | inter | 5.64 | 4.31E-30 | 97.73+/-1.07 | 91.8+/-13.11 |
| chr21:27440461 | APP | exon, first_exon | inter | -8.38 | 3.15E-04 | 43.51+/-7.55 | 46.94+/-8.66 |
| chr21:27425720 | APP | intron | inter | -5.97 | 3.92E-04 | 71.73+/-8.46 | 72.17+/-7.82 |
| chr21:27423439 | APP | exon | inter | -8.87 | 4.20E-04 | 71.2+/-11.58 | 71.76+/-10.89 |
| chr21:27512686 | APP | intron | inter | 11.23 | 4.90E-03 | 49.37+/-10.35 | 46.34+/-13.17 |
| chr21:27440539 | APP | exon, first_exon | inter | -5.28 | 9.95E-03 | 40.56+/-6.92 | 42.85+/-7.66 |
| chr21:27423455 | APP | exon | inter | -6.30 | 1.20E-02 | 78.08+/-11.18 | 77.24+/-9.41 |
| chr21:27512770 | APP | intron | inter | 5.28 | 2.72E-02 | 67.72+/-4.63 | 64.27+/-6.3 |
| chr21:27423344 | APP | exon | inter | -7.06 | 4.41E-02 | 79.6+/-7.69 | 82.86+/-6.93 |
| chr6:33243552 | B3GALT4 | promoter | shores | 5.74 | 3.17E-14 | 94.02+/-2.97 | 89.84+/-13.25 |
| chr6:33245541 | B3GALT4 | exon, CDS, first_exon | islands | -5.91 | 6.57E-04 | 2.2+/-1.98 | 12.02+/-9.86 |
| chr6:33252335 | B3GALT4 | exon | inter | -13.76 | 1.49E-03 | 74.25+/-23.68 | 83.51+/-22.84 |
| chr11:27679916 | BDNF | exon, CDS | inter | 16.42 | 1.85E-10 | 84.1+/-18.3 | 64.94+/-27.65 |
| chr11:27742151 | BDNF | intron | islands | 5.00 | 2.28E-02 | 17.64+/-9.56 | 9.46+/-3.76 |
| chr2:127813826 | BIN1 | intron | inter | 7.42 | 1.84E-18 | 94.79+/-4.33 | 90.57+/-12.38 |
| chr2:127821206 | BIN1 | exon | shelves | 5.61 | 1.26E-07 | 97.58+/-2.09 | 89.43+/-24.97 |
| chr2:127808075 | BIN1 | exon | inter | 6.84 | 3.40E-05 | 44.22+/-11.06 | 40.74+/-9.94 |
| chr14:54418410 | BMP4 | exon, UTR, first_exon | shores | 25.36 | 1.81E-30 | 58.97+/-31.19 | 59.44+/-35.62 |
| chr10:73472449 | C10orf105/CDH23 | exon, UTR/exon, first_exon | inter | 13.11 | 1.05E-05 | 35+/-7.77 | 32.96+/-12.17 |
| chr10:73472462 | C10orf105/CDH23 | exon, UTR/exon, first_exon | inter | 11.96 | 5.23E-04 | 39.08+/-9.06 | 37.13+/-12.8 |
| chr10:73472442 | C10orf105/CDH23 | exon, UTR/exon, first_exon | inter | 13.28 | 1.90E-03 | 45.63+/-12.92 | 49.28+/-16.36 |
| chr10:73472468 | C10orf105/CDH23 | exon, UTR/exon, first_exon | inter | 11.42 | 3.59E-03 | 50.66+/-13.47 | 53.21+/-12.06 |
| chr10:73472882 | C10orf105/CDH23 | exon, UTR/intron | inter | 8.38 | 9.68E-15 | 28.26+/-23.9 | 29.72+/-15.45 |
| chr10:73473376 | C10orf105/CDH23 | exon, UTR/intron | inter | 8.71 | 6.31E-03 | 33.05+/-9.33 | 32.91+/-12.24 |
| chr10:73472628 | C10orf105/CDH23 | exon, UTR/intron | inter | 10.19 | 1.72E-02 | 60.08+/-15.03 | 54.79+/-14.98 |
| chr10:73472315 | C10orf105/CDH23 | exon, UTR/promoter | inter | 6.15 | 3.62E-02 | 55.3+/-8.34 | 55.14+/-12.77 |
| chr10:73483850 | C10orf105/CDH23 | intron/exon | inter | 7.63 | 1.38E-13 | 81.85+/-11.26 | 79.39+/-11.92 |
| chr10:73483838 | C10orf105/CDH23 | intron/exon | inter | 8.18 | 5.54E-06 | 63.54+/-11.15 | 58.32+/-13.9 |
| chr10:73483828 | C10orf105/CDH23 | intron/exon | inter | 5.49 | 2.15E-04 | 55.9+/-9.59 | 54.33+/-14.09 |
| chr10:73499071 | C10orf105/CDH23 | promoter/intron | inter | 6.30 | 2.26E-28 | 92.99+/-14.24 | 88.35+/-18.4 |
| chr10:73498867 | C10orf105/CDH23 | promoter/intron | inter | 10.92 | 1.77E-04 | 74.26+/-6.21 | 73.08+/-13.24 |
| chr10:73498845 | C10orf105/CDH23 | promoter/intron | inter | 11.52 | 8.26E-04 | 56.44+/-9.94 | 57.78+/-17.13 |
| chr10:73498857 | C10orf105/CDH23 | promoter/intron | inter | 13.04 | 2.30E-03 | 62.68+/-7.92 | 59.99+/-17.06 |
| chr10:73498713 | C10orf105/CDH23 | promoter/intron | inter | 12.43 | 2.61E-03 | 60.68+/-8.52 | 57.47+/-16.38 |
| chr10:73498901 | C10orf105/CDH23 | promoter/intron | inter | 8.02 | 1.07E-02 | 70.16+/-8.73 | 69.88+/-11.13 |
| chr10:73498756 | C10orf105/CDH23 | promoter/intron | inter | 10.70 | 2.93E-02 | 72.75+/-6.01 | 72.19+/-15.27 |
| chr10:73498683 | C10orf105/CDH23 | promoter/intron | inter | 6.83 | 3.58E-02 | 80.73+/-10.05 | 81.51+/-9.73 |
| chr19:13445144 | CACNA1A | exon | inter | -30.21 | 7.89E-30 | 19.4+/-23.16 | 42.19+/-26.75 |
| chr19:13734776 | CACNA1A | exon, UTR, first_exon | inter | 12.57 | 1.26E-10 | 34.7+/-14.47 | 24.89+/-15.34 |
| chr19:13409407 | CACNA1A | exon, CDS | shores | -13.51 | 1.41E-08 | 18.52+/-17.94 | 30.45+/-18.86 |
| chr19:13734794 | CACNA1A | exon, UTR, first_exon | inter | 10.84 | 3.69E-08 | 68.61+/-7.98 | 57.97+/-18.22 |
| chr19:13409394 | CACNA1A | exon, CDS | shores | -15.14 | 6.36E-08 | 30.3+/-14.3 | 41.96+/-21.19 |
| chr19:13409376 | CACNA1A | exon, CDS | shores | -14.12 | 9.46E-07 | 28.9+/-20.67 | 37.78+/-17.39 |
| chr19:13318556 | CACNA1A | exon, UTR | islands | 14.07 | 6.63E-06 | 69.31+/-17.08 | 53.04+/-17.5 |
| chr19:13409367 | CACNA1A | exon, CDS | shores | -12.98 | 1.49E-05 | 26.18+/-17.59 | 36.26+/-19.43 |
| chr19:13734720 | CACNA1A | exon, UTR, first_exon | inter | 6.71 | 3.50E-05 | 63.34+/-15.6 | 59.41+/-13.27 |
| chr19:13409411 | CACNA1A | exon, CDS | shores | -10.40 | 4.59E-05 | 24.7+/-17.18 | 27.99+/-15.43 |
| chr19:13409398 | CACNA1A | exon, CDS | shores | -12.20 | 6.59E-05 | 27.42+/-20.63 | 34.9+/-20.91 |
| chr19:13409396 | CACNA1A | exon, CDS | shores | -11.95 | 2.37E-04 | 26.3+/-21.88 | 34.18+/-18.1 |
| chr19:13629888 | CACNA1A | exon, UTR | inter | 5.03 | 2.44E-04 | 89.45+/-8.28 | 85.67+/-14.7 |
| chr19:13734744 | CACNA1A | exon, UTR, first_exon | inter | 7.43 | 4.57E-04 | 56.56+/-17.23 | 50.16+/-15.71 |
| chr19:13409931 | CACNA1A | exon, CDS | islands | -9.47 | 5.84E-04 | 59.52+/-18.08 | 61.9+/-15.44 |
| chr19:13409614 | CACNA1A | exon, CDS | islands | -9.63 | 8.35E-04 | 7.89+/-8.18 | 16.27+/-14.27 |
| chr19:13735370 | CACNA1A | promoter | inter | 6.58 | 9.98E-04 | 43.7+/-12.16 | 38.42+/-7.82 |
| chr19:13409914 | CACNA1A | exon, CDS | islands | -9.73 | 1.13E-03 | 46.65+/-18.01 | 50.87+/-16.87 |
| chr19:13409606 | CACNA1A | exon, CDS | islands | -10.41 | 2.57E-03 | 10.84+/-7.66 | 21.14+/-17.15 |
| chr19:13409859 | CACNA1A | exon, CDS | islands | -13.17 | 3.22E-03 | 39.46+/-21.06 | 46.86+/-20.29 |
| chr19:13410050 | CACNA1A | exon, CDS | islands | -7.46 | 6.03E-03 | 81.65+/-10.94 | 84.07+/-6.38 |
| chr19:13409884 | CACNA1A | exon, CDS | islands | -10.77 | 6.38E-03 | 46.61+/-18.27 | 52.48+/-18.78 |
| chr19:13409769 | CACNA1A | exon, CDS | islands | -10.66 | 6.82E-03 | 36.92+/-17.84 | 44.96+/-21.14 |
| chr19:13319579 | CACNA1A | exon, CDS | islands | 9.56 | 8.28E-03 | 53.38+/-19.88 | 47.7+/-16.16 |
| chr19:13409825 | CACNA1A | exon, CDS | islands | -8.38 | 9.50E-03 | 27.19+/-18.15 | 32.31+/-18.46 |
| chr19:13409887 | CACNA1A | exon, CDS | islands | -8.70 | 1.37E-02 | 45.47+/-19.58 | 47.94+/-17.43 |
| chr19:13409889 | CACNA1A | exon, CDS | islands | -10.32 | 1.62E-02 | 42.89+/-19.73 | 48.28+/-19.62 |
| chr19:13734725 | CACNA1A | exon, UTR, first_exon | inter | 6.95 | 1.72E-02 | 62.02+/-22.18 | 52.44+/-15.09 |
| chr19:13409851 | CACNA1A | exon, CDS | islands | -8.02 | 1.90E-02 | 31.5+/-20.19 | 33.73+/-14.77 |
| chr19:13409755 | CACNA1A | exon, CDS | islands | -9.07 | 2.37E-02 | 48.73+/-22.92 | 50.52+/-15.91 |
| chr19:13409734 | CACNA1A | exon, CDS | islands | -12.49 | 2.40E-02 | 39.15+/-23.8 | 46.75+/-15.48 |
| chr19:13409422 | CACNA1A | exon, CDS | shores | -9.80 | 2.42E-02 | 28.9+/-16.03 | 33.71+/-19.83 |
| chr19:13318560 | CACNA1A | exon, UTR | islands | 7.01 | 3.06E-02 | 71.04+/-19.62 | 65.35+/-13.62 |
| chr19:13409822 | CACNA1A | exon, CDS | islands | -8.43 | 3.39E-02 | 26.72+/-19.52 | 31.43+/-17.74 |
| chr19:13409830 | CACNA1A | exon, CDS | islands | -7.93 | 3.45E-02 | 34.39+/-23.03 | 38.92+/-20.38 |
| chr19:13409445 | CACNA1A | exon, CDS | shores | -10.23 | 4.22E-02 | 29.12+/-21.08 | 35.84+/-20.7 |
| chr19:13409808 | CACNA1A | exon, CDS | islands | -8.64 | 4.71E-02 | 31.89+/-17.56 | 37.09+/-18.72 |
| chr10:73406598 | CDH23 | intron | inter | 28.57 | 5.98E-108 | 87.67+/-16.94 | 59.01+/-36.79 |
| chr10:73377069 | CDH23 | exon, first_exon | inter | 18.82 | 3.68E-88 | 95.15+/-1.59 | 81.93+/-25.86 |
| chr10:73537448 | CDH23 | exon, CDS | shelves | -24.18 | 9.46E-81 | 83.02+/-23.88 | 96.63+/-2.76 |
| chr10:73199595 | CDH23 | exon, CDS, first_exon | inter | 14.84 | 5.24E-51 | 94.54+/-5.01 | 79.62+/-28.6 |
| chr10:73569749 | CDH23 | exon | shelves | -15.54 | 2.87E-22 | 72.92+/-23.06 | 74.99+/-22.29 |
| chr10:73406636 | CDH23 | intron | inter | -6.26 | 6.40E-20 | 67.29+/-34.44 | 83.24+/-13.87 |
| chr10:73558885 | CDH23 | exon | inter | 16.36 | 3.84E-13 | 76.89+/-35.34 | 66.7+/-28.93 |
| chr10:73562743 | CDH23 | exon | shelves | 17.56 | 2.96E-11 | 77.84+/-35.25 | 64.26+/-29.57 |
| chr10:73553177 | CDH23 | exon, CDS | inter | 5.25 | 2.17E-08 | 95.05+/-2.82 | 92.48+/-11.48 |
| chr10:73407465 | CDH23 | intron | inter | -16.41 | 4.80E-06 | 45.95+/-22.78 | 45.13+/-19.17 |
| chr10:73537978 | CDH23 | exon, CDS | inter | 17.36 | 7.35E-06 | 82.96+/-32.9 | 74.84+/-26.49 |
| chr10:73558952 | CDH23 | exon | inter | 10.40 | 5.23E-04 | 75.74+/-35.05 | 72.32+/-23.93 |
| chr10:73544085 | CDH23 | exon, CDS | inter | 15.88 | 1.14E-02 | 88.49+/-19.93 | 79.6+/-21.58 |
| chr10:73434858 | CDH23 | intron | inter | 5.66 | 2.72E-02 | 61.16+/-6.44 | 60.27+/-7.86 |
| chr10:73565942 | CDH23 | exon | shores | -8.69 | 2.72E-02 | 65.25+/-10.25 | 66.64+/-8.11 |
| chr10:73468940 | CDH23 | exon, CDS | inter | 5.95 | 2.80E-02 | 68.48+/-8.51 | 65.55+/-6.99 |
| chr10:73553201 | CDH23 | exon, CDS | inter | -5.31 | 3.50E-02 | 80.14+/-10.2 | 85.23+/-4.57 |
| chr5:79096052 | CMYA5 | exon | inter | -16.68 | 6.98E-31 | 75.83+/-21.97 | 87.68+/-13.8 |
| chr5:79095417 | CMYA5 | exon | inter | -8.78 | 6.70E-25 | 84.17+/-19.81 | 94.95+/-2.37 |
| chr5:79095720 | CMYA5 | exon | inter | -9.57 | 3.05E-19 | 75.59+/-22.57 | 79.74+/-21.22 |
| chr5:79033390 | CMYA5 | promoter | inter | -12.26 | 8.39E-17 | 88.68+/-16.71 | 91.82+/-13.34 |
| chr5:79031557 | CMYA5 | exon, CDS | inter | -13.97 | 1.60E-11 | 81.17+/-20.09 | 87.81+/-11.14 |
| chr5:79089265 | CMYA5 | exon | inter | -11.33 | 4.44E-05 | 58.65+/-11.58 | 62.73+/-9.25 |
| chr5:79031476 | CMYA5 | exon, CDS | inter | -6.42 | 1.02E-03 | 57.99+/-8.92 | 64.5+/-3.76 |
| chr7:155327438 | CNPY1 | promoter | shores | 6.15 | 5.59E-15 | 87.86+/-9.15 | 86.6+/-18.03 |
| chr7:155294179 | CNPY1 | exon, UTR | inter | -8.37 | 2.79E-11 | 84.1+/-8.98 | 87.12+/-2.47 |
| chr7:155294416 | CNPY1 | exon, UTR | inter | -14.47 | 3.43E-10 | 34.51+/-17.24 | 43.76+/-7.41 |
| chr7:155294422 | CNPY1 | exon, UTR | inter | -14.12 | 2.06E-09 | 38.69+/-16 | 44.39+/-12.62 |
| chr7:155294428 | CNPY1 | exon, UTR | inter | -11.12 | 4.67E-08 | 62.63+/-15.84 | 63.26+/-13.45 |
| chr7:155294404 | CNPY1 | exon, UTR | inter | -9.31 | 1.21E-07 | 23.14+/-10.84 | 28.93+/-11.89 |
| chr7:155294998 | CNPY1 | exon, UTR | inter | -5.36 | 2.69E-05 | 22.88+/-10.09 | 26.8+/-10.79 |
| chr7:155266930 | CNPY1 | exon, UTR | inter | -9.08 | 3.74E-04 | 46.4+/-15.21 | 59.44+/-10.69 |
| chr7:155327298 | CNPY1 | promoter | shores | -6.96 | 1.53E-03 | 50.12+/-12.25 | 55.52+/-14.35 |
| chr7:155295755 | CNPY1 | exon, UTR | inter | -5.56 | 3.25E-03 | 18.04+/-8.2 | 23.71+/-8.94 |
| chr7:155294003 | CNPY1 | exon, UTR | inter | -8.04 | 3.35E-03 | 72.35+/-14.34 | 78+/-4.27 |
| chr7:155327051 | CNPY1 | promoter | shores | -5.44 | 6.63E-03 | 21.08+/-14.71 | 22.15+/-10.96 |
| chr7:155295743 | CNPY1 | exon, UTR | inter | -5.12 | 1.16E-02 | 14.48+/-6.42 | 18.64+/-7.52 |
| chr2:208463292 | CREB1 | intron | inter | 5.38 | 2.83E-28 | 98.92+/-0.94 | 93.92+/-13.84 |
| chr19:18889034 | CRTC1 | exon, UTR | shores | -14.51 | 1.53E-09 | 69.52+/-13.87 | 74.13+/-14.11 |
| chr19:18889003 | CRTC1 | exon, UTR | shores | -15.07 | 5.24E-06 | 60.91+/-13.79 | 65.45+/-14.5 |
| chr19:18892227 | CRTC1 | exon, UTR | shelves | 5.75 | 1.16E-05 | 94.55+/-3.9 | 90.71+/-11.69 |
| chr19:18888942 | CRTC1 | exon, UTR | islands | -12.42 | 2.23E-05 | 76.51+/-15.69 | 80.43+/-14.03 |
| chr19:18888931 | CRTC1 | exon, UTR | islands | -15.56 | 4.74E-05 | 65.93+/-16.82 | 70.96+/-17.47 |
| chr19:18888855 | CRTC1 | exon, UTR | islands | -14.82 | 5.79E-05 | 64.02+/-19.02 | 67.25+/-14.15 |
| chr19:18888968 | CRTC1 | exon, UTR | islands | -11.98 | 7.91E-05 | 76.88+/-17.02 | 77.8+/-12.96 |
| chr19:18888759 | CRTC1 | exon, UTR | islands | -14.40 | 1.36E-04 | 65.54+/-21.15 | 68.77+/-13.73 |
| chr19:18888276 | CRTC1 | exon, UTR | islands | -18.45 | 1.36E-04 | 67.71+/-21.72 | 68.14+/-17.33 |
| chr19:18888806 | CRTC1 | exon, UTR | islands | -11.52 | 1.50E-04 | 68.21+/-17.34 | 68.63+/-14.08 |
| chr19:18888915 | CRTC1 | exon, UTR | islands | -13.32 | 1.77E-04 | 67.09+/-14.81 | 71.53+/-13.45 |
| chr19:18793853 | CRTC1 | promoter | shores | -6.07 | 3.17E-04 | 12.84+/-4.36 | 19.65+/-6.79 |
| chr19:18888884 | CRTC1 | exon, UTR | islands | -13.84 | 3.26E-04 | 66.8+/-18.08 | 66.63+/-18.8 |
| chr19:18888590 | CRTC1 | exon, UTR | islands | -13.05 | 3.70E-04 | 77.01+/-17.08 | 83.28+/-10.43 |
| chr19:18888966 | CRTC1 | exon, UTR | islands | -13.08 | 5.35E-04 | 62.39+/-21.43 | 63.12+/-15.74 |
| chr19:18888962 | CRTC1 | exon, UTR | islands | -13.53 | 1.13E-03 | 65.7+/-18.95 | 67.57+/-14.95 |
| chr19:18888637 | CRTC1 | exon, UTR | islands | -13.57 | 1.55E-03 | 60.95+/-22.74 | 60.67+/-18.76 |
| chr19:18888900 | CRTC1 | exon, UTR | islands | -10.02 | 2.06E-03 | 81.55+/-14.84 | 83.44+/-12.43 |
| chr19:18888668 | CRTC1 | exon, UTR | islands | -12.38 | 3.14E-03 | 57.5+/-21.49 | 59.38+/-13.6 |
| chr19:18888280 | CRTC1 | exon, UTR | islands | -15.76 | 3.59E-03 | 74.26+/-16.74 | 76.34+/-14.58 |
| chr19:18888246 | CRTC1 | exon, UTR | islands | -16.03 | 3.64E-03 | 68.53+/-22.02 | 67.98+/-14.52 |
| chr19:18888799 | CRTC1 | exon, UTR | islands | -13.99 | 3.81E-03 | 66.9+/-16.92 | 71.93+/-13.14 |
| chr19:18888227 | CRTC1 | exon, UTR | islands | -15.04 | 4.01E-03 | 72.97+/-22.88 | 71.4+/-15.07 |
| chr19:18888952 | CRTC1 | exon, UTR | islands | -10.96 | 1.89E-02 | 70.61+/-18.06 | 68.72+/-15.9 |
| chr19:18888230 | CRTC1 | exon, UTR | islands | -11.90 | 1.89E-02 | 83.02+/-11.33 | 87.4+/-9.58 |
| chr19:18888815 | CRTC1 | exon, UTR | islands | -10.33 | 3.50E-02 | 78.93+/-15 | 80.23+/-12.22 |
| chr19:18888865 | CRTC1 | exon, UTR | islands | -9.25 | 3.63E-02 | 80.14+/-14.21 | 81.73+/-10.79 |
| chr19:18888840 | CRTC1 | exon, UTR | islands | -9.42 | 3.63E-02 | 82.6+/-13.59 | 82.83+/-11.98 |
| chr19:18888599 | CRTC1 | exon, UTR | islands | -11.78 | 3.94E-02 | 72.77+/-17.45 | 78.64+/-13.49 |
| chr19:18889147 | CRTC1 | exon, UTR | shores | -7.27 | 4.19E-02 | 76.6+/-11.39 | 78.26+/-10.73 |
| chr19:18888252 | CRTC1 | exon, UTR | islands | -11.83 | 4.71E-02 | 79.69+/-16.39 | 77.91+/-15.82 |
| chr19:18888694 | CRTC1 | exon, UTR | islands | -10.06 | 4.74E-02 | 73.49+/-15.72 | 77.89+/-11.72 |
| chr9:90321583 | DAPK1 | exon, UTR | shores | -18.24 | 8.64E-24 | 48.79+/-27.11 | 50.27+/-39.65 |
| chr9:90262234 | DAPK1 | promoter | inter | 5.32 | 2.04E-20 | 94.74+/-4.24 | 92.02+/-13.15 |
| chr9:90321115 | DAPK1 | exon, UTR | shores | 5.24 | 2.02E-08 | 81.42+/-2.33 | 76.97+/-12.74 |
| chr9:90315135 | DAPK1 | exon, UTR | inter | 6.13 | 1.38E-02 | 82.16+/-3.34 | 79.47+/-6.8 |
| chr11:636199 | DRD4 | promoter | shores | 22.13 | 3.78E-18 | 34.44+/-30.58 | 23.49+/-23.79 |
| chr11:636508 | DRD4 | promoter | islands | -9.54 | 1.72E-02 | 51.63+/-14.5 | 54.62+/-13.82 |
| chr11:639444 | DRD4 | exon | islands | -12.91 | 2.68E-02 | 52.41+/-14.64 | 58.67+/-16.55 |
| chr11:636923 | DRD4 | promoter | islands | -5.09 | 4.49E-02 | 10.95+/-2.47 | 13.83+/-8.44 |
| chr6:311938 | DUSP22 | exon, CDS | inter | -10.96 | 2.05E-16 | 15.43+/-12.43 | 22.86+/-11.87 |
| chr6:351093 | DUSP22 | exon, UTR | inter | 8.17 | 2.22E-10 | 85.26+/-7.7 | 78.33+/-8.22 |
| chr6:311892 | DUSP22 | exon, CDS | inter | -9.26 | 5.22E-08 | 30.78+/-17.31 | 34.94+/-15.57 |
| chr6:311890 | DUSP22 | exon, CDS | inter | -8.97 | 2.62E-07 | 24.61+/-15.68 | 30.69+/-14.7 |
| chr6:291504 | DUSP22 | promoter | shores | 5.33 | 2.10E-06 | 42.92+/-12.47 | 39.01+/-10.47 |
| chr6:338023 | DUSP22 | exon, first_exon | inter | -7.26 | 4.46E-06 | 32.08+/-12.14 | 40.77+/-13.05 |
| chr6:349848 | DUSP22 | intron | inter | 5.05 | 9.21E-06 | 93.16+/-3.59 | 89.21+/-5.28 |
| chr6:292399 | DUSP22 | exon, UTR, first_exon | islands | 19.21 | 1.02E-05 | 53.98+/-26.36 | 37.2+/-18.14 |
| chr6:291533 | DUSP22 | promoter | shores | 6.61 | 6.36E-05 | 36.24+/-13.85 | 29.67+/-12.55 |
| chr6:292311 | DUSP22 | exon, UTR, first_exon | islands | 16.41 | 1.95E-04 | 48.73+/-23.1 | 39+/-19.41 |
| chr6:291634 | DUSP22 | exon, UTR, first_exon | shores | 6.74 | 2.38E-03 | 47.47+/-16.68 | 36.69+/-17.26 |
| chr6:292371 | DUSP22 | promoter | islands | 15.08 | 7.72E-03 | 49.22+/-23.08 | 37.53+/-17.72 |
| chr6:292440 | DUSP22 | promoter | islands | 15.77 | 1.04E-02 | 46.06+/-22.97 | 35.99+/-19.83 |
| chr6:291687 | DUSP22 | exon, UTR, first_exon | shores | 9.29 | 1.33E-02 | 41.41+/-18.45 | 33.47+/-16.83 |
| chr6:292385 | DUSP22 | exon, UTR, first_exon | islands | 11.90 | 1.44E-02 | 53.48+/-27.2 | 46.02+/-22.12 |
| chr6:292355 | DUSP22 | promoter | islands | 11.81 | 1.64E-02 | 57.48+/-25.01 | 47.01+/-22.1 |
| chr6:292304 | DUSP22 | exon, UTR, first_exon | islands | 10.23 | 1.86E-02 | 56.18+/-26.87 | 51.01+/-22.36 |
| chr6:292389 | DUSP22 | exon, UTR, first_exon | islands | 13.86 | 2.17E-02 | 51.09+/-24.95 | 39.9+/-18.96 |
| chr6:292314 | DUSP22 | exon, UTR, first_exon | islands | 9.59 | 2.56E-02 | 54.75+/-25.82 | 49.74+/-22.64 |
| chr6:292329 | DUSP22 | exon, UTR, first_exon | islands | 12.24 | 2.78E-02 | 54.22+/-25.43 | 43.07+/-21.91 |
| chr6:292291 | DUSP22 | exon, UTR, first_exon | islands | 10.44 | 4.75E-02 | 56.79+/-26.88 | 48.02+/-22.64 |
| chr1:43834757 | ELOVL1 | promoter | shores | 5.04 | 1.53E-03 | 70.68+/-9.18 | 66.63+/-8.4 |
| chr3:27759159 | EOMES | exon, CDS | shelves | 5.75 | 7.91E-07 | 89.33+/-5.78 | 83.27+/-7.5 |
| chr3:27760901 | EOMES | exon | shores | 5.90 | 3.34E-02 | 52.9+/-8.3 | 48.35+/-10.99 |
| chr1:46859774 | FAAH | promoter | islands | 12.98 | 3.11E-06 | 63.99+/-13.03 | 59.24+/-9.49 |
| chr1:46858748 | FAAH | promoter | shores | -17.18 | 1.97E-04 | 60.3+/-42.29 | 69.14+/-30.72 |
| chr1:46859671 | FAAH | promoter | shores | 6.39 | 1.29E-03 | 75.38+/-9.77 | 73.49+/-7.76 |
| chr12:133064919 | FBRSL1 | promoter | shores | -6.01 | 2.60E-04 | 12.3+/-4.17 | 19.79+/-8.95 |
| chr12:133065155 | FBRSL1 | promoter | shores | -6.13 | 7.19E-04 | 4.7+/-2.86 | 11.59+/-9.14 |
| chr12:133065223 | FBRSL1 | promoter | shores | -5.24 | 2.76E-04 | 1.29+/-1.26 | 8.96+/-7.86 |
| chr12:133083889 | FBRSL1 | exon | inter | -5.19 | 2.78E-02 | 21.58+/-8.88 | 26.18+/-9.55 |
| chr12:133084873 | FBRSL1 | exon | inter | -5.31 | 8.10E-05 | 89.36+/-8.27 | 92.37+/-5.24 |
| chr12:133085873 | FBRSL1 | exon | inter | -9.31 | 1.86E-19 | 90.73+/-13.34 | 94.5+/-8.77 |
| chr12:133085876 | FBRSL1 | exon | inter | -7.94 | 2.51E-12 | 91.09+/-10.47 | 95.56+/-6.74 |
| chr12:133085885 | FBRSL1 | exon | inter | -7.69 | 6.73E-15 | 92.55+/-12.2 | 95.21+/-5.9 |
| chr12:133086073 | FBRSL1 | exon | inter | -5.33 | 5.79E-09 | 93.4+/-10.91 | 94.5+/-9.69 |
| chr12:133086133 | FBRSL1 | exon | inter | -6.24 | 1.80E-10 | 93.37+/-8.38 | 95.89+/-7 |
| chr12:133086139 | FBRSL1 | exon | inter | -7.00 | 2.18E-12 | 91.95+/-10.35 | 93.75+/-8.6 |
| chr12:133086155 | FBRSL1 | exon | inter | -7.99 | 4.43E-11 | 91.36+/-10.23 | 96.12+/-5.69 |
| chr12:133086169 | FBRSL1 | exon | inter | -9.55 | 3.85E-13 | 90.54+/-10.65 | 95.04+/-7.45 |
| chr12:133086172 | FBRSL1 | exon | inter | -6.52 | 8.91E-09 | 92.66+/-9.11 | 95.78+/-7.2 |
| chr12:133086178 | FBRSL1 | exon | inter | -8.21 | 1.93E-09 | 92.2+/-11.04 | 95.1+/-7.51 |
| chr12:133086196 | FBRSL1 | exon | inter | -9.44 | 2.16E-11 | 90.6+/-11.35 | 94.59+/-7.65 |
| chr12:133086235 | FBRSL1 | exon | inter | -8.02 | 5.10E-10 | 91.04+/-10.63 | 93.18+/-8.62 |
| chr12:133086259 | FBRSL1 | exon | inter | -8.77 | 1.86E-10 | 91.8+/-9.54 | 95.82+/-4.64 |
| chr12:133086268 | FBRSL1 | exon | inter | -7.39 | 2.81E-10 | 93.79+/-9.29 | 96.88+/-5.05 |
| chr12:133086298 | FBRSL1 | exon | inter | -5.12 | 5.64E-10 | 94.62+/-8.06 | 94.48+/-9.84 |
| chr12:133086304 | FBRSL1 | exon | inter | -6.06 | 6.19E-07 | 90.93+/-9.69 | 91.27+/-10.37 |
| chr12:133086313 | FBRSL1 | exon | inter | -6.23 | 1.47E-05 | 91.25+/-7.63 | 94.76+/-4 |
| chr12:133086317 | FBRSL1 | exon | inter | -7.88 | 5.36E-09 | 89.89+/-9.09 | 92.07+/-9.82 |
| chr12:133086376 | FBRSL1 | exon | inter | -6.65 | 9.12E-08 | 88.23+/-7.72 | 89.5+/-10.74 |
| chr12:133086389 | FBRSL1 | exon | inter | -6.18 | 4.77E-07 | 91.17+/-9.09 | 91.95+/-8.64 |
| chr12:133086409 | FBRSL1 | exon | inter | -6.65 | 2.73E-06 | 90+/-8.91 | 92.54+/-8.36 |
| chr12:133086422 | FBRSL1 | exon | inter | -7.22 | 6.63E-06 | 87.25+/-12.72 | 87.2+/-9.09 |
| chr12:133086424 | FBRSL1 | exon | inter | -7.47 | 4.22E-08 | 87.76+/-10.39 | 90.86+/-8.44 |
| chr12:133086442 | FBRSL1 | exon | inter | -9.37 | 3.53E-13 | 86.94+/-12.92 | 91.17+/-6.64 |
| chr12:133086448 | FBRSL1 | exon | inter | -8.55 | 1.38E-12 | 89.26+/-13.39 | 91.42+/-6.77 |
| chr12:133086451 | FBRSL1 | exon | inter | -6.37 | 4.20E-05 | 83.97+/-12 | 83.31+/-10.85 |
| chr12:133086454 | FBRSL1 | exon | inter | -5.76 | 2.63E-05 | 86.14+/-13.43 | 85.9+/-10.17 |
| chr12:133086459 | FBRSL1 | exon | inter | -6.73 | 5.30E-10 | 90.78+/-12.02 | 93.63+/-8.18 |
| chr12:133086493 | FBRSL1 | exon | inter | -7.78 | 4.04E-09 | 87.29+/-13.62 | 88.28+/-10.26 |
| chr12:133086496 | FBRSL1 | exon | inter | -8.01 | 2.68E-13 | 88.76+/-12.2 | 91.45+/-14.27 |
| chr12:133086532 | FBRSL1 | exon | inter | -7.91 | 1.70E-08 | 87.21+/-10.99 | 91.23+/-10.15 |
| chr12:133086559 | FBRSL1 | exon | inter | -6.48 | 2.18E-08 | 91.86+/-10.49 | 94.09+/-9.52 |
| chr12:133086565 | FBRSL1 | exon | inter | -8.25 | 1.06E-14 | 90.94+/-11.64 | 94.3+/-9.33 |
| chr12:133086568 | FBRSL1 | exon | inter | -6.57 | 5.33E-10 | 92.35+/-9.47 | 95.21+/-9.59 |
| chr12:133086572 | FBRSL1 | exon | inter | -6.10 | 5.31E-08 | 91+/-9.01 | 93.85+/-9.39 |
| chr12:133086580 | FBRSL1 | exon | inter | -5.61 | 7.25E-11 | 93.1+/-11.26 | 94.99+/-8.46 |
| chr12:133086624 | FBRSL1 | exon | inter | -5.54 | 5.80E-05 | 91.34+/-9 | 93.66+/-7.33 |
| chr12:133086635 | FBRSL1 | exon | inter | -5.13 | 7.89E-07 | 92.56+/-8.32 | 94.9+/-6.86 |
| chr12:133086653 | FBRSL1 | exon | inter | -8.19 | 1.51E-14 | 90.84+/-12.43 | 94.74+/-7.47 |
| chr12:133086658 | FBRSL1 | exon | inter | -5.12 | 1.35E-07 | 92.17+/-9.64 | 93.03+/-8.99 |
| chr12:133086662 | FBRSL1 | exon | inter | -6.69 | 6.09E-08 | 87.76+/-11.13 | 90.7+/-8.51 |
| chr12:133086680 | FBRSL1 | exon | inter | -5.87 | 9.26E-11 | 91.31+/-9.88 | 95.07+/-6.92 |
| chr12:133086715 | FBRSL1 | exon | inter | -5.95 | 5.35E-10 | 90.35+/-8.16 | 94.09+/-7.28 |
| chr12:133086754 | FBRSL1 | exon | inter | -6.23 | 3.04E-09 | 90.32+/-8.04 | 95.34+/-6.61 |
| chr12:133086758 | FBRSL1 | exon | inter | -6.15 | 9.16E-11 | 92.35+/-9.91 | 95.07+/-7.57 |
| chr12:133086794 | FBRSL1 | exon | inter | -8.56 | 6.98E-16 | 87.81+/-11.75 | 93.07+/-9.97 |
| chr12:133086850 | FBRSL1 | exon | inter | -6.60 | 9.81E-08 | 91.66+/-9.06 | 93.61+/-7.56 |
| chr12:133086880 | FBRSL1 | exon | inter | -9.08 | 4.79E-19 | 90.89+/-11.55 | 95.99+/-7.7 |
| chr12:133086883 | FBRSL1 | exon | inter | -8.36 | 7.99E-16 | 91.65+/-12.33 | 94.67+/-6.86 |
| chr12:133086905 | FBRSL1 | exon | inter | -6.38 | 2.03E-13 | 93.28+/-9.96 | 95.79+/-5.6 |
| chr12:133086990 | FBRSL1 | exon | inter | -7.05 | 1.50E-12 | 91.19+/-9.7 | 95.69+/-5.83 |
| chr12:133102350 | FBRSL1 | exon, CDS | islands | 6.14 | 9.51E-12 | 97.56+/-1.76 | 94.57+/-12.81 |
| chr12:133148752 | FBRSL1 | exon, first_exon | islands | 5.19 | 2.00E-02 | 81.34+/-5.39 | 75+/-9.79 |
| chr12:133160467 | FBRSL1 | exon, UTR | islands | 20.23 | 3.38E-63 | 92.84+/-7.79 | 78.33+/-30.24 |
| chr6:30708274 | FLOT1 | exon, CDS | shelves | 5.24 | 3.48E-15 | 94.64+/-4.79 | 91.84+/-12.69 |
| chr9:89559401 | GAS1 | exon, UTR, first_exon | shores | 6.81 | 2.12E-04 | 56.57+/-16.12 | 49.41+/-10.36 |
| chr9:89560072 | GAS1 | exon, UTR, first_exon | shores | -5.23 | 8.99E-03 | 60.98+/-12.12 | 63.82+/-7.8 |
| chr6:34029204 | GRM4 | exon | inter | 27.63 | 1.69E-104 | 47.81+/-39 | 30.71+/-29.05 |
| chr6:34026938 | GRM4 | exon | shelves | 23.61 | 3.68E-81 | 18.1+/-23.71 | 2.63+/-7.08 |
| chr6:34029047 | GRM4 | exon | inter | 26.58 | 4.85E-53 | 51.35+/-39.31 | 41.02+/-32.54 |
| chr6:34123877 | GRM4 | promoter | shores | -16.78 | 8.48E-37 | 38.61+/-34.89 | 55.54+/-34.94 |
| chr6:34123390 | GRM4 | exon, UTR, first_exon | shores | -14.08 | 5.08E-18 | 47.38+/-37.77 | 60.54+/-35.68 |
| chr6:34028509 | GRM4 | exon | inter | 5.89 | 7.59E-16 | 94.11+/-3.41 | 90.84+/-12.89 |
| chr6:34124369 | GRM4 | promoter | shores | -9.94 | 2.40E-10 | 32.45+/-27.38 | 40.86+/-28.05 |
| chr6:34030821 | GRM4 | intron | inter | -5.74 | 3.29E-07 | 57.89+/-10.55 | 59.81+/-10.45 |
| chr6:34028093 | GRM4 | exon | shelves | -7.88 | 3.73E-06 | 86.94+/-17.63 | 90.56+/-10.55 |
| chr6:34078484 | GRM4 | intron | inter | -5.88 | 9.25E-06 | 89.35+/-10.71 | 94.82+/-3.13 |
| chr6:34024399 | GRM4 | exon | islands | 7.59 | 2.14E-05 | 54.19+/-16.26 | 51.92+/-11.53 |
| chr6:34078462 | GRM4 | intron | inter | 20.51 | 4.85E-05 | 31.57+/-26.98 | 24.14+/-26.5 |
| chr6:34123489 | GRM4 | promoter | shores | -9.00 | 4.86E-04 | 38.91+/-31.9 | 48.41+/-26.32 |
| chr6:34124380 | GRM4 | promoter | shores | 5.88 | 8.23E-04 | 61.66+/-7.24 | 55.77+/-10.06 |
| chr6:34023353 | GRM4 | exon | shores | -5.79 | 9.38E-04 | 11.55+/-4.35 | 15.85+/-5.56 |
| chr6:34024336 | GRM4 | exon | islands | 5.64 | 9.36E-03 | 47.53+/-9.91 | 42.08+/-13.7 |
| chr6:34024362 | GRM4 | exon | islands | 5.77 | 9.91E-03 | 87.38+/-7.3 | 79.3+/-9.98 |
| chr6:34024312 | GRM4 | exon | islands | 11.24 | 1.04E-02 | 58.18+/-9.3 | 41.44+/-15.08 |
| chr6:34123333 | GRM4 | exon, UTR, first_exon | shores | -8.52 | 1.11E-02 | 54.22+/-10.26 | 62.5+/-7.75 |
| chr6:34023694 | GRM4 | exon | shores | -6.36 | 1.62E-02 | 72.3+/-6.25 | 77.37+/-7.98 |
| chr6:34024076 | GRM4 | exon | shores | 7.69 | 2.17E-02 | 51.64+/-4.37 | 43.36+/-15.41 |
| chr6:29975328 | HLA-J/ZNRD1-AS1 | exon/intron | islands | -6.17 | 7.20E-10 | 7.82+/-5 | 11.19+/-12.14 |
| chr6:29974065 | HLA-J/ZNRD1-AS1 | promoter/intron | shores | -5.94 | 1.41E-07 | 14.82+/-11.65 | 18.88+/-11.35 |
| chr6:29974022 | HLA-J/ZNRD1-AS1 | promoter/intron | shores | -7.41 | 5.51E-06 | 32.68+/-15.76 | 33.68+/-14.67 |
| chr6:29973407 | HLA-J/ZNRD1-AS1 | promoter/intron | shores | 8.22 | 3.52E-02 | 70.66+/-6.26 | 66.81+/-9.42 |
| chr22:35782831 | HMOX1 | promoter | inter | 7.48 | 3.77E-26 | 98.13+/-1.53 | 93.99+/-14.49 |
| chr22:35782911 | HMOX1 | promoter | inter | 7.77 | 1.91E-18 | 91.33+/-2.46 | 86.58+/-14.49 |
| chr22:35774876 | HMOX1 | promoter | shelves | 6.12 | 1.64E-16 | 81.87+/-6.47 | 80.27+/-16.28 |
| chr22:35777184 | HMOX1 | exon, first_exon | islands | 8.15 | 1.70E-05 | 8.05+/-19.82 | 0.17+/-0.55 |
| chr6:30713295 | IER3 | promoter | shores | -23.48 | 4.49E-72 | 73.05+/-24.04 | 83.49+/-21.64 |
| chr6:30712839 | IER3 | promoter | shores | -9.18 | 2.24E-02 | 75.86+/-15.16 | 85.11+/-3.99 |
| chr4:6051617 | JAKMIP1 | intron | inter | -5.76 | 4.33E-05 | 75.22+/-5.62 | 77.5+/-4.41 |
| chr4:6107546 | JAKMIP1 | intron | islands | -7.76 | 5.23E-04 | 67.46+/-15.08 | 73.79+/-9.71 |
| chr4:6114676 | JAKMIP1 | intron | islands | 13.58 | 5.65E-04 | 96.65+/-2.43 | 93.46+/-14.08 |
| chr4:6052355 | JAKMIP1 | exon, CDS | inter | 5.99 | 1.85E-02 | 75.31+/-9.17 | 71.71+/-11.57 |
| chr4:6107226 | JAKMIP1 | intron | islands | 11.79 | 2.97E-02 | 60.69+/-9.43 | 53.93+/-12.27 |
| chr4:6107280 | JAKMIP1 | intron | islands | 7.73 | 3.18E-02 | 54.43+/-7.93 | 50.59+/-10.97 |
| chr17:72351374 | KIF19 | exon, CDS | shores | 7.16 | 2.78E-13 | 94.42+/-2.86 | 91.06+/-12.06 |
| chr17:72351406 | KIF19 | exon, CDS | shores | 19.37 | 7.05E-11 | 55.1+/-21.91 | 41.34+/-34.04 |
| chr17:72345115 | KIF19 | exon, first_exon | shelves | -12.11 | 6.36E-08 | 27.29+/-19.32 | 35.91+/-21.09 |
| chr17:72321958 | KIF19 | promoter | islands | 8.49 | 1.07E-06 | 44.56+/-14.77 | 39.08+/-11.75 |
| chr17:72349067 | KIF19 | exon, CDS | shores | -12.74 | 4.44E-06 | 42.09+/-32.43 | 52.99+/-32.08 |
| chr17:72321961 | KIF19 | promoter | islands | 6.74 | 5.09E-04 | 37.53+/-6.25 | 31.66+/-11.62 |
| chr17:72348242 | KIF19 | exon, CDS | islands | 5.89 | 6.30E-04 | 6.96+/-5.34 | 4.58+/-4.2 |
| chr17:72321956 | KIF19 | promoter | islands | 5.26 | 1.22E-03 | 14.77+/-5.46 | 9.77+/-5.5 |
| chr17:72321949 | KIF19 | promoter | islands | 6.57 | 1.42E-03 | 35.49+/-12.55 | 34.28+/-8.98 |
| chr17:72348228 | KIF19 | exon, CDS | islands | 10.65 | 2.06E-03 | 27.76+/-8.61 | 20.94+/-9.8 |
| chr17:72343968 | KIF19 | promoter | shelves | -9.89 | 6.36E-03 | 71.6+/-9.17 | 70.82+/-11.51 |
| chr17:72348239 | KIF19 | exon, CDS | islands | 10.13 | 6.97E-03 | 23.77+/-7.74 | 17.29+/-11.74 |
| chr17:72343981 | KIF19 | promoter | shelves | -7.50 | 8.26E-03 | 64.08+/-11.79 | 60.53+/-10.21 |
| chr17:72348210 | KIF19 | exon, CDS | islands | 6.12 | 1.37E-02 | 14.15+/-9.48 | 7.91+/-3.97 |
| chr17:72343951 | KIF19 | promoter | shelves | -7.83 | 2.63E-02 | 75.35+/-11.66 | 70.83+/-12.33 |
| chr6:168431480 | KIF25 | exon, first_exon | inter | -15.47 | 2.69E-33 | 87.41+/-17.22 | 94.17+/-2.32 |
| chr6:168399879 | KIF25 | exon, UTR, first_exon | shelves | 5.33 | 3.53E-28 | 68.17+/-23.94 | 58.95+/-33.45 |
| chr6:168440826 | KIF25 | exon, CDS | inter | -13.28 | 5.01E-18 | 88.03+/-15.16 | 89.69+/-14.87 |
| chr19:51480510 | KLK7 | exon, UTR | inter | 6.64 | 4.52E-48 | 93.73+/-1.01 | 87+/-16.61 |
| chr19:51480312 | KLK7 | exon, UTR | inter | -6.58 | 1.73E-22 | 78.69+/-18.19 | 84.94+/-12.58 |
| chr19:51487478 | KLK7 | promoter | inter | 8.57 | 2.57E-08 | 26.08+/-6.85 | 19.06+/-9.44 |
| chr19:51487506 | KLK7 | promoter | inter | 11.11 | 8.75E-08 | 31.1+/-14.33 | 20.39+/-10.1 |
| chr19:51487209 | KLK7 | exon, first_exon | inter | 12.09 | 1.68E-04 | 32.46+/-21.04 | 20.09+/-12.48 |
| chr19:51485352 | KLK7 | exon | inter | -7.15 | 1.28E-03 | 87.87+/-13.81 | 93.81+/-2.77 |
| chr19:51485078 | KLK7 | exon, UTR | inter | 5.42 | 2.35E-03 | 94.6+/-3.17 | 89.21+/-5.83 |
| chr19:51483506 | KLK7 | exon, CDS | inter | -7.59 | 3.18E-03 | 57.34+/-13.64 | 60.8+/-13.93 |
| chr19:51483154 | KLK7 | exon, CDS | inter | 5.98 | 6.95E-03 | 67.97+/-17.32 | 61.48+/-13.65 |
| chr19:51487220 | KLK7 | exon, first_exon | inter | 7.43 | 3.02E-02 | 23.8+/-17.27 | 14.73+/-9.02 |
| chr9:126777471 | LHX2 | promoter | islands | 5.83 | 2.10E-02 | 23.82+/-11.37 | 12.81+/-7.08 |
| chr9:126762837 | LHX2 | promoter | shores | 5.20 | 2.27E-02 | 15.33+/-12.25 | 11.96+/-9.86 |
| chr9:126777422 | LHX2 | promoter | islands | 6.16 | 2.86E-02 | 27.12+/-11.81 | 23.21+/-13.25 |
| chr9:126777465 | LHX2 | promoter | islands | 6.16 | 2.89E-02 | 25.64+/-9.54 | 17.12+/-5.06 |
| chr9:126795162 | LHX2 | exon, UTR | inter | 5.31 | 3.57E-02 | 86.16+/-9.16 | 81.34+/-6.73 |
| chr17:43971230 | MAPT | promoter | shores | -6.71 | 1.59E-03 | 56.53+/-13.45 | 63.13+/-8.02 |
| chr17:44050822 | MAPT | exon, UTR, first_exon | inter | 15.44 | 4.81E-07 | 76.65+/-29.12 | 68.89+/-24.86 |
| chr17:44051923 | MAPT | promoter | inter | 17.19 | 2.04E-04 | 75.73+/-33.42 | 65.52+/-31.53 |
| chr17:44052493 | MAPT | promoter | inter | 8.23 | 7.59E-03 | 71.85+/-3.35 | 67.81+/-7.36 |
| chr17:44054236 | MAPT | exon, first_exon | inter | 18.99 | 4.04E-08 | 75.92+/-34.14 | 68.06+/-30.92 |
| chr17:44054466 | MAPT | exon, first_exon | inter | -6.01 | 3.51E-03 | 81.13+/-9.78 | 81.69+/-7.55 |
| chr17:44054508 | MAPT | exon, first_exon | inter | -6.12 | 1.97E-02 | 78.9+/-9.49 | 81.3+/-8.64 |
| chr17:44054839 | MAPT | exon, first_exon | inter | -7.77 | 2.80E-03 | 44.97+/-12.01 | 43.33+/-9.53 |
| chr17:44056832 | MAPT | exon, first_exon | shelves | 17.35 | 6.07E-05 | 60.86+/-27.14 | 49.3+/-25.46 |
| chr17:44057594 | MAPT | exon, first_exon | shelves | 20.24 | 1.26E-04 | 71.95+/-36.84 | 65.32+/-33.47 |
| chr17:44060247 | MAPT | exon, first_exon | islands | 19.83 | 5.60E-07 | 73.75+/-31.99 | 64.6+/-32.16 |
| chr17:44061022 | MAPT | exon, first_exon | shores | 18.96 | 1.53E-04 | 68.37+/-29.25 | 58.76+/-27.6 |
| chr17:44061260 | MAPT | exon, first_exon | shores | -6.18 | 1.73E-04 | 66.56+/-12.24 | 67.76+/-11.54 |
| chr17:44061278 | MAPT | exon, first_exon | shores | 13.42 | 4.30E-03 | 62.64+/-29.84 | 55.08+/-28.29 |
| chr17:44068923 | MAPT | exon, CDS | inter | 19.31 | 5.01E-06 | 71.88+/-33.95 | 66.2+/-34.74 |
| chr17:44068927 | MAPT | exon, CDS | inter | 5.21 | 3.94E-17 | 95.33+/-1.3 | 92.01+/-12.38 |
| chr17:44073988 | MAPT | exon, CDS | inter | -5.12 | 4.83E-02 | 84.72+/-5.52 | 90.03+/-5.9 |
| chr17:44102000 | MAPT | exon, UTR | inter | 13.50 | 1.95E-02 | 86.49+/-7.8 | 84.3+/-15.12 |
| chr17:44102584 | MAPT | exon, UTR | inter | 7.23 | 2.17E-24 | 94.76+/-6.5 | 93.11+/-11.75 |
| chr17:44103258 | MAPT | exon, UTR | inter | 9.86 | 7.51E-03 | 83.64+/-4.71 | 77.15+/-7.27 |
| chr17:44103553 | MAPT | exon, UTR | inter | 13.70 | 2.43E-04 | 53.51+/-13.74 | 47.98+/-16.14 |
| chr17:44103658 | MAPT | exon, UTR | inter | 15.19 | 4.02E-02 | 53.22+/-8.9 | 48.5+/-16.68 |
| chr17:44103671 | MAPT | exon, UTR | inter | 15.23 | 2.92E-02 | 56.93+/-9.48 | 51.85+/-16.73 |
| chr17:44103786 | MAPT | exon, UTR | inter | 14.48 | 4.23E-02 | 65.2+/-9.56 | 61.67+/-19.66 |
| chr17:44103815 | MAPT | exon, UTR | inter | 15.14 | 2.74E-02 | 54.05+/-7.82 | 48.4+/-16.83 |
| chr17:44103914 | MAPT | exon, UTR | inter | 12.63 | 1.53E-04 | 37.28+/-11.79 | 35.79+/-14.41 |
| chr17:44103957 | MAPT | exon, UTR | inter | 17.88 | 4.23E-04 | 56.62+/-10.35 | 52.64+/-16.13 |
| chr17:44103975 | MAPT | exon, UTR | inter | 17.01 | 1.87E-03 | 72.02+/-10.81 | 72.65+/-18.55 |
| chr17:44103999 | MAPT | exon, UTR | inter | 15.39 | 2.29E-03 | 54.58+/-7.29 | 55.15+/-17.34 |
| chr17:44104179 | MAPT | exon, UTR | inter | 10.66 | 4.83E-03 | 49.36+/-12.12 | 51.81+/-15.26 |
| chr17:44104319 | MAPT | exon, UTR | inter | 7.60 | 4.02E-03 | 23.95+/-9.31 | 25.05+/-10.81 |
| chr17:44104393 | MAPT | exon, UTR | inter | 10.14 | 4.67E-03 | 31.21+/-10.01 | 29.36+/-12.11 |
| chr17:44104586 | MAPT | exon, UTR | inter | 13.65 | 7.53E-08 | 31.19+/-11.87 | 28.11+/-10.5 |
| chr17:44104686 | MAPT | exon, UTR | inter | 18.63 | 2.36E-12 | 60.58+/-7.48 | 50.07+/-13.11 |
| chr17:44105229 | MAPT | exon, UTR | inter | 12.28 | 5.24E-03 | 53.2+/-5.61 | 46.24+/-10 |
| chr18:74693395 | MBP | intron | shores | 8.04 | 5.76E-73 | 83.01+/-22.38 | 79.75+/-29.1 |
| chr18:74702863 | MBP | intron | inter | -19.51 | 9.29E-61 | 21.76+/-23.24 | 35.15+/-29.03 |
| chr18:74695777 | MBP | intron | inter | 8.88 | 1.12E-43 | 7.3+/-20.35 | 0.19+/-0.61 |
| chr18:74697407 | MBP | intron | inter | -17.30 | 1.08E-39 | 63.02+/-35.64 | 84.93+/-19.7 |
| chr18:74701983 | MBP | exon, CDS | inter | 5.84 | 1.85E-38 | 84.37+/-18.84 | 82.74+/-21.26 |
| chr18:74699134 | MBP | intron | inter | 12.39 | 1.94E-33 | 80.48+/-8.44 | 68.82+/-29.07 |
| chr18:74696525 | MBP | intron | inter | -17.73 | 3.18E-28 | 64.69+/-35.84 | 86.64+/-20.5 |
| chr18:74694543 | MBP | exon, UTR | shelves | -5.57 | 7.92E-25 | 91.02+/-17.17 | 94.99+/-2.51 |
| chr18:74727631 | MBP | exon, UTR | inter | -5.37 | 6.56E-19 | 38.59+/-22.63 | 48.4+/-16.78 |
| chr18:74799373 | MBP | intron | islands | 18.43 | 5.86E-18 | 84.29+/-7.75 | 68.58+/-15.18 |
| chr18:74799394 | MBP | intron | islands | 19.02 | 1.36E-17 | 87.92+/-5.44 | 70.91+/-16.57 |
| chr18:74799500 | MBP | intron | islands | 19.74 | 2.21E-16 | 92.87+/-5.03 | 78.55+/-15.08 |
| chr18:74799492 | MBP | intron | islands | 17.66 | 2.46E-15 | 94.42+/-3.8 | 81.83+/-13.54 |
| chr18:74695143 | MBP | intron | shelves | 6.17 | 3.72E-15 | 30.11+/-14.34 | 22.62+/-13.12 |
| chr18:74725348 | MBP | exon, UTR | inter | 9.01 | 2.25E-13 | 86.85+/-12.05 | 76.3+/-26.54 |
| chr18:74799551 | MBP | intron | islands | 18.23 | 2.68E-13 | 93.53+/-4.18 | 81.05+/-10.92 |
| chr18:74799371 | MBP | intron | islands | 17.57 | 1.92E-12 | 67.7+/-7.81 | 56.23+/-14.37 |
| chr18:74799488 | MBP | intron | islands | 18.15 | 2.36E-12 | 89.84+/-8.81 | 77.06+/-14.75 |
| chr18:74799495 | MBP | intron | islands | 18.03 | 2.80E-11 | 90+/-6.57 | 77.11+/-13.99 |
| chr18:74799413 | MBP | intron | islands | 17.25 | 2.96E-11 | 85.83+/-7.3 | 70.74+/-16.59 |
| chr18:74799490 | MBP | intron | islands | 16.15 | 2.35E-10 | 88.86+/-5.85 | 79.04+/-13.09 |
| chr18:74799320 | MBP | intron | islands | 12.51 | 6.43E-10 | 74.05+/-6.57 | 63.81+/-13.38 |
| chr18:74799549 | MBP | intron | islands | 15.30 | 1.21E-09 | 90.65+/-9.6 | 80.13+/-12.08 |
| chr18:74799575 | MBP | intron | islands | 18.66 | 2.73E-09 | 89.23+/-7.16 | 78.28+/-12.71 |
| chr18:74799572 | MBP | intron | islands | 17.29 | 8.58E-09 | 89.61+/-6.62 | 76.89+/-13.94 |
| chr18:74702851 | MBP | intron | inter | -9.07 | 1.33E-08 | 68.03+/-10.35 | 75.22+/-10.97 |
| chr18:74799556 | MBP | intron | islands | 16.58 | 4.26E-08 | 91.52+/-6.39 | 80.94+/-12.31 |
| chr18:74799411 | MBP | intron | islands | 16.69 | 3.35E-07 | 64.02+/-22.42 | 46.68+/-22.72 |
| chr18:74695205 | MBP | intron | shelves | 6.07 | 2.10E-06 | 83.73+/-11.93 | 80.44+/-7.11 |
| chr18:74817167 | MBP | exon, CDS | inter | -7.04 | 1.19E-05 | 59.6+/-10.18 | 66.07+/-9.29 |
| chr18:74728823 | MBP | exon, CDS | inter | -8.09 | 1.64E-05 | 86.35+/-23.19 | 98.52+/-1.11 |
| chr18:74698585 | MBP | intron | inter | 14.87 | 4.55E-04 | 61.45+/-5.62 | 53.67+/-13.48 |
| chr18:74692795 | MBP | intron | shores | -5.17 | 5.99E-03 | 81.68+/-16.02 | 92.12+/-3.66 |
| chr18:74726214 | MBP | exon, UTR | inter | -7.15 | 1.37E-02 | 85.42+/-22.01 | 95.79+/-4.43 |
| chr18:74807414 | MBP | intron | shelves | 9.71 | 1.85E-02 | 44.6+/-11.35 | 44.13+/-14.97 |
| chr18:74698603 | MBP | intron | inter | 6.26 | 2.20E-02 | 89.25+/-4.37 | 84.71+/-5.43 |
| chr18:74695224 | MBP | intron | shelves | 5.39 | 2.53E-02 | 68.54+/-13.77 | 68.46+/-9.66 |
| chr18:74700602 | MBP | intron | inter | -5.61 | 4.11E-02 | 81.23+/-2.02 | 85.36+/-4.3 |
| chr18:74722006 | MBP | intron | inter | -10.24 | 4.77E-02 | 82.56+/-21.4 | 83.1+/-27.11 |
| chr22:50527817 | MOV10L1 | promoter | shores | -9.26 | 3.69E-08 | 76.55+/-34.72 | 70.75+/-31.37 |
| chr22:50528054 | MOV10L1 | promoter | shores | -7.57 | 2.98E-04 | 76.7+/-12.92 | 77.15+/-7.66 |
| chr22:50528251 | MOV10L1 | promoter | islands | 6.10 | 1.64E-02 | 17.06+/-13.23 | 7.51+/-5.86 |
| chr22:50528450 | MOV10L1 | exon, UTR, first_exon | islands | 10.53 | 3.37E-04 | 78.14+/-14.47 | 66.62+/-13.85 |
| chr22:50528459 | MOV10L1 | promoter | islands | 6.71 | 4.67E-03 | 52.02+/-18.56 | 44.65+/-13.06 |
| chr22:50528669 | MOV10L1 | promoter | islands | 7.08 | 2.59E-02 | 60.65+/-16.91 | 59.6+/-10.12 |
| chr22:50529071 | MOV10L1 | intron | islands | -15.10 | 2.34E-43 | 92.06+/-18.63 | 97.76+/-2.63 |
| chr22:50546666 | MOV10L1 | exon, CDS | inter | -14.83 | 2.63E-14 | 77.59+/-34.83 | 74.52+/-29.43 |
| chr22:50572472 | MOV10L1 | exon, UTR | inter | -10.39 | 1.23E-12 | 74.66+/-32.54 | 71.39+/-28.28 |
| chr22:50582550 | MOV10L1 | exon, CDS | inter | -8.35 | 1.78E-08 | 79.45+/-32.55 | 77.94+/-23.06 |
| chr22:50582666 | MOV10L1 | exon, CDS | inter | 5.32 | 2.95E-02 | 66.22+/-8.16 | 61.4+/-9.68 |
| chr22:50584129 | MOV10L1 | promoter | inter | 5.80 | 5.44E-11 | 91.46+/-3.15 | 87.28+/-11.42 |
| chr22:50585393 | MOV10L1 | promoter | inter | 7.09 | 6.11E-04 | 85.21+/-7.7 | 80.21+/-5.89 |
| chr22:50585400 | MOV10L1 | exon, UTR, first_exon | inter | 6.42 | 3.02E-03 | 82.91+/-7.41 | 77.86+/-6.89 |
| chr22:50585413 | MOV10L1 | exon, UTR, first_exon | inter | 6.16 | 2.87E-03 | 84.41+/-5.62 | 78.99+/-7.08 |
| chr22:50585427 | MOV10L1 | exon, UTR, first_exon | inter | 9.89 | 7.21E-09 | 79.29+/-9.28 | 73.44+/-6.66 |
| chr22:50585490 | MOV10L1 | exon, UTR, first_exon | inter | 8.56 | 3.00E-04 | 73.75+/-8.92 | 67.47+/-6.24 |
| chr22:50587951 | MOV10L1 | exon, UTR, first_exon | inter | 10.59 | 2.60E-05 | 69.43+/-8.5 | 60.92+/-13.57 |
| chr22:50588008 | MOV10L1 | exon, UTR, first_exon | inter | 5.17 | 1.34E-02 | 71.69+/-4.17 | 68.79+/-7.71 |
| chr22:50596654 | MOV10L1 | exon, CDS | inter | -5.68 | 8.66E-10 | 85.53+/-16 | 89.27+/-5.99 |
| chr11:19901631 | NAV2 | exon, CDS | inter | -9.70 | 3.58E-40 | 47.91+/-24.9 | 56.78+/-31.85 |
| chr11:20044114 | NAV2 | exon, UTR, first_exon | inter | 7.42 | 2.55E-36 | 93.17+/-3.21 | 84.7+/-15.43 |
| chr11:20101704 | NAV2 | exon, CDS | inter | 15.73 | 3.70E-20 | 15.95+/-19.93 | 8.94+/-17.11 |
| chr11:20139843 | NAV2 | exon | inter | 6.55 | 5.16E-19 | 95.74+/-2.7 | 91.6+/-12.68 |
| chr11:20112491 | NAV2 | exon, CDS | inter | -10.98 | 2.14E-12 | 40.42+/-38.02 | 54.11+/-35.29 |
| chr11:19955322 | NAV2 | exon, CDS | inter | -5.03 | 1.16E-09 | 88.41+/-13.99 | 94.44+/-2.11 |
| chr11:19371522 | NAV2 | promoter | shelves | 9.55 | 1.87E-09 | 71.86+/-9.86 | 65.69+/-8.45 |
| chr11:19371067 | NAV2 | promoter | shelves | 6.31 | 2.69E-09 | 81.52+/-12.2 | 76.79+/-10.1 |
| chr11:19371465 | NAV2 | promoter | shelves | -5.89 | 1.89E-02 | 57.07+/-12.87 | 59.83+/-8.26 |
| chr1:39491459 | NDUFS5 | promoter | inter | -8.87 | 3.23E-04 | 35.42+/-8.8 | 42.06+/-7.33 |
| chr1:39491348 | NDUFS5 | promoter | inter | -8.92 | 2.09E-02 | 48.86+/-8.47 | 58.67+/-8.59 |
| chr1:39500094 | NDUFS5 | exon, CDS | inter | 5.92 | 4.43E-02 | 60.85+/-10.38 | 55.74+/-11.15 |
| chr4:103458876 | NFKB1 | exon, first_exon | inter | 33.60 | 1.80E-107 | 59.51+/-30.64 | 28.54+/-36.15 |
| chr4:103514605 | NFKB1 | exon, first_exon | inter | -12.49 | 1.36E-03 | 44.45+/-7.27 | 50.12+/-13.57 |
| chr17:47587819 | NGFR | exon, CDS | shelves | 13.05 | 1.77E-19 | 86.05+/-21.32 | 75.26+/-21.97 |
| chr17:47583677 | NGFR | exon, UTR | islands | -5.50 | 1.06E-04 | 85.15+/-7.62 | 85.29+/-4.66 |
| chr17:47589394 | NGFR | exon, CDS | shores | -11.42 | 3.17E-02 | 66.13+/-6.82 | 71.68+/-10.25 |
| chr19:41190874 | NUMBL | exon, first_exon | shores | -16.71 | 5.25E-44 | 56.45+/-33.79 | 84.22+/-23.15 |
| chr19:41191584 | NUMBL | exon, first_exon | shores | -14.04 | 5.15E-33 | 76.96+/-19.29 | 85.78+/-4.64 |
| chr19:41197662 | NUMBL | promoter | shores | -9.70 | 3.33E-07 | 57.76+/-9.43 | 60.11+/-11.69 |
| chr19:41197525 | NUMBL | promoter | shores | -6.67 | 2.50E-05 | 62.08+/-10.72 | 61.51+/-18.11 |
| chr19:41197589 | NUMBL | promoter | shores | -7.09 | 5.06E-05 | 67.96+/-9.54 | 68.46+/-10.85 |
| chr19:41197652 | NUMBL | promoter | shores | -8.73 | 5.34E-05 | 37.16+/-11.39 | 39.98+/-9.51 |
| chr19:41197737 | NUMBL | promoter | shores | -10.22 | 9.68E-05 | 65.54+/-10.97 | 66.75+/-9.4 |
| chr19:41197703 | NUMBL | promoter | shores | -7.78 | 1.27E-04 | 76.52+/-11.48 | 76.44+/-5.79 |
| chr19:41197598 | NUMBL | promoter | shores | -5.66 | 1.65E-04 | 26.76+/-8.5 | 28.39+/-7.73 |
| chr19:41195526 | NUMBL | intron | shores | 9.69 | 6.84E-04 | 46.29+/-11.94 | 43.33+/-15.55 |
| chr19:41197723 | NUMBL | promoter | shores | -6.93 | 8.43E-03 | 72.12+/-6.31 | 74.16+/-8 |
| chr19:41197384 | NUMBL | promoter | shores | -5.01 | 4.07E-02 | 35.88+/-7.91 | 40.36+/-17.82 |
| chr1:29190137 | OPRD1 | exon, UTR | shores | 47.85 | 4.34E-125 | 50.42+/-36.14 | 23.36+/-34.02 |
| chr1:29138162 | OPRD1 | promoter | shores | 8.72 | 2.73E-03 | 80.29+/-7.56 | 70.24+/-9.97 |
| chr1:29189836 | OPRD1 | exon, UTR | islands | -7.66 | 4.30E-03 | 76.88+/-10.99 | 83.15+/-8.87 |
| chr1:29189818 | OPRD1 | exon, UTR | islands | -8.50 | 1.76E-02 | 80.47+/-13.27 | 90.46+/-6.49 |
| chr1:29138200 | OPRD1 | promoter | shores | -6.41 | 4.22E-02 | 82.98+/-11.87 | 84.97+/-8.76 |
| chr13:66877393 | PCDH9 | exon, UTR | inter | -11.41 | 3.45E-09 | 72.48+/-13.15 | 77.35+/-4.58 |
| chr13:67802512 | PCDH9 | exon, CDS | shelves | -6.19 | 5.70E-08 | 73.25+/-9.48 | 78.78+/-7.51 |
| chr13:67801122 | PCDH9 | exon, CDS | shelves | -10.45 | 4.21E-05 | 43.29+/-12.01 | 46.35+/-9.74 |
| chr13:67799686 | PCDH9 | exon, CDS | inter | -6.51 | 1.31E-04 | 44.92+/-14.53 | 51.54+/-8.58 |
| chr13:67799701 | PCDH9 | exon, CDS | inter | -6.20 | 1.35E-04 | 71.75+/-9.12 | 73.82+/-6.23 |
| chr13:67801043 | PCDH9 | exon, CDS | shelves | -8.17 | 3.48E-04 | 61.75+/-13.12 | 63.27+/-8.42 |
| chr13:67801551 | PCDH9 | exon, CDS | shelves | -5.01 | 8.02E-04 | 78.81+/-8.48 | 79.29+/-9.13 |
| chr13:67801125 | PCDH9 | exon, CDS | shelves | -6.98 | 9.40E-03 | 28.9+/-14.07 | 33.39+/-10.14 |
| chr13:67802655 | PCDH9 | exon, UTR | shores | -5.21 | 3.66E-02 | 57.59+/-12.23 | 58.52+/-7.84 |
| chr13:67802395 | PCDH9 | exon, CDS | shelves | -5.20 | 4.36E-02 | 48.01+/-13.94 | 52.05+/-7.59 |
| chr5:146434146 | PPP2R2B | intron | inter | 24.35 | 1.98E-46 | 74.18+/-27.88 | 50.9+/-28.76 |
| chr5:146435481 | PPP2R2B | intron | inter | 6.06 | 1.57E-08 | 50.44+/-17.55 | 47.08+/-12.2 |
| chr5:146435620 | PPP2R2B | intron | inter | 5.22 | 3.14E-03 | 26.01+/-19.62 | 20.17+/-7.86 |
| chr1:3352502 | PRDM16 | exon, UTR | shores | -20.05 | 1.50E-26 | 4.94+/-10.2 | 26.2+/-34.86 |
| chr1:3354708 | PRDM16 | exon, UTR | shelves | -5.38 | 4.42E-26 | 88.78+/-17.76 | 94.93+/-1.35 |
| chr1:3352174 | PRDM16 | exon, UTR | shores | -6.03 | 8.05E-23 | 89.64+/-16.13 | 94.48+/-2.6 |
| chr1:3352202 | PRDM16 | exon, UTR | shores | -5.79 | 5.44E-18 | 85.06+/-16.66 | 90.63+/-4.49 |
| chr1:3352328 | PRDM16 | exon, UTR | shores | -7.21 | 4.33E-10 | 78.81+/-15.88 | 87.25+/-3.94 |
| chr1:3352865 | PRDM16 | exon, UTR | shores | -9.89 | 1.18E-04 | 82.43+/-22.54 | 91.87+/-12.2 |
| chr1:3154621 | PRDM16 | exon, first_exon | shores | 9.63 | 1.22E-03 | 83.75+/-20.23 | 77.6+/-24.02 |
| chr1:3319386 | PRDM16 | exon, CDS | shores | 11.39 | 5.93E-03 | 94.93+/-2.38 | 89.63+/-11.56 |
| chr1:3103106 | PRDM16 | intron | islands | -5.48 | 2.08E-02 | 85.75+/-4.16 | 87.98+/-4.64 |
| chr6:32117171 | PRRT1 | exon, CDS | islands | 6.13 | 3.51E-02 | 56.29+/-16.21 | 46.6+/-11.33 |
| chr6:32117154 | PRRT1 | exon, CDS | islands | 6.19 | 3.86E-02 | 54.27+/-8.92 | 50.72+/-13.84 |
| chr14:73612768 | PSEN1 | promoter | inter | 5.58 | 5.53E-20 | 95.89+/-4.06 | 93.3+/-15.06 |
| chr14:73688842 | PSEN1 | exon, UTR | inter | 6.93 | 1.40E-04 | 41.91+/-11.61 | 40.47+/-7.59 |
| chr1:186650441 | PTGS2 | promoter | shores | -5.15 | 1.50E-03 | 10.93+/-3.68 | 16.27+/-5.53 |
| chr1:180144484 | QSOX1 | exon, CDS | inter | -32.29 | 6.16E-110 | 72.84+/-35.28 | 88.8+/-15.24 |
| chr1:180168817 | QSOX1 | exon, UTR | inter | 6.89 | 5.66E-29 | 96.62+/-1.15 | 91.94+/-13.05 |
| chr1:180165741 | QSOX1 | promoter | inter | 5.10 | 4.31E-11 | 93.83+/-5.27 | 91.21+/-10.19 |
| chr1:180158797 | QSOX1 | exon, CDS | inter | 8.29 | 2.30E-03 | 72.44+/-8.5 | 68.91+/-10.77 |
| chr1:180165488 | QSOX1 | promoter | inter | 9.87 | 8.62E-03 | 73.22+/-10.71 | 68.32+/-12.45 |
| chr17:74472997 | RHBDF2 | exon | shelves | -7.43 | 5.47E-29 | 91.19+/-15.88 | 96.46+/-2.38 |
| chr17:74477691 | RHBDF2 | intron | shelves | -25.13 | 1.69E-24 | 30.72+/-23.03 | 46.44+/-17.94 |
| chr17:74477620 | RHBDF2 | exon, UTR | shelves | 16.26 | 5.86E-18 | 63.2+/-9.43 | 49.99+/-22.09 |
| chr17:74467016 | RHBDF2 | exon, UTR | shores | 11.38 | 2.63E-16 | 83.99+/-13.91 | 76.69+/-25 |
| chr17:74475023 | RHBDF2 | exon | shores | 7.91 | 1.51E-07 | 21.76+/-23.23 | 11.23+/-19.38 |
| chr17:74483966 | RHBDF2 | exon | inter | -8.69 | 3.25E-03 | 68.98+/-7.95 | 73.55+/-7.99 |
| chr17:74498833 | RHBDF2 | promoter | shores | 10.11 | 4.44E-03 | 51.8+/-13.55 | 51.89+/-16.88 |
| chr17:74469757 | RHBDF2 | promoter | shores | -7.65 | 1.91E-02 | 74.04+/-5.98 | 77.53+/-10.11 |
| chr22:45821909 | RIBC2 | exon | inter | -26.42 | 2.37E-79 | 62.44+/-40.5 | 83.47+/-21.97 |
| chr22:45821934 | RIBC2 | exon | inter | -27.00 | 2.35E-77 | 62.89+/-40.65 | 83.52+/-20.81 |
| chr22:45813686 | RIBC2 | promoter | shelves | -27.02 | 2.74E-65 | 57.61+/-44.69 | 83.13+/-19.57 |
| chr22:45809250 | RIBC2 | promoter | islands | 7.71 | 5.14E-04 | 48.03+/-11.7 | 35.11+/-12.24 |
| chr22:45809257 | RIBC2 | promoter | islands | 11.93 | 1.59E-03 | 53.91+/-12.85 | 37.34+/-11.82 |
| chr22:45821956 | RIBC2 | exon | inter | 10.22 | 4.56E-03 | 68.49+/-41.68 | 68.29+/-28.06 |
| chr22:45809299 | RIBC2 | promoter | islands | -5.20 | 1.09E-02 | 69.02+/-6.62 | 73.03+/-12.1 |
| chr22:45809290 | RIBC2 | promoter | islands | -5.11 | 1.73E-02 | 45.97+/-13.13 | 50.24+/-10.67 |
| chr6:30044002 | RNF39 | promoter | shores | -7.04 | 2.71E-03 | 45.25+/-13.91 | 47.44+/-10.26 |
| chr6:30043877 | RNF39 | promoter | shores | -5.88 | 8.73E-03 | 57.36+/-12.22 | 59.18+/-7.89 |
| chr6:30044986 | RNF39 | promoter | shores | 12.60 | 2.39E-02 | 57.9+/-13.17 | 47.04+/-17.64 |
| chr6:30044091 | RNF39 | promoter | shores | -6.68 | 2.43E-02 | 59.83+/-8.27 | 63.69+/-7.57 |
| chr8:38458370 | RNF5P1 | exon, first_exon | inter | 9.45 | 1.07E-29 | 81.32+/-17.7 | 65.12+/-21.37 |
| chr1:153540764 | S100A2 | promoter | inter | -6.20 | 7.08E-04 | 73.91+/-5.63 | 80.72+/-5.91 |
| chr22:51153370 | SHANK3 | exon, CDS | inter | 6.15 | 2.47E-09 | 98.95+/-0.8 | 91.7+/-17.35 |
| chr22:51170685 | SHANK3 | exon, UTR | shores | 5.55 | 1.67E-03 | 73.31+/-8.1 | 70.59+/-11.32 |
| chr22:51170762 | SHANK3 | exon, UTR | shores | 7.07 | 2.58E-02 | 60.6+/-9.02 | 51.63+/-11.43 |
| chr22:51170777 | SHANK3 | exon, UTR | shores | 6.01 | 2.88E-02 | 74.4+/-5.62 | 66.49+/-6.83 |
| chr22:51170756 | SHANK3 | exon, UTR | shores | 5.66 | 4.22E-02 | 83.5+/-4.64 | 79.14+/-8.98 |
| chr10:98924599 | SLIT1 | exon | inter | -6.22 | 6.25E-24 | 91.62+/-16.38 | 97.05+/-3.76 |
| chr10:98817715 | SLIT1 | exon, UTR | inter | 7.23 | 3.05E-05 | 52.48+/-13.27 | 48.2+/-6.02 |
| chr10:98917644 | SLIT1 | exon | inter | -8.16 | 1.09E-04 | 42.49+/-5.47 | 51.84+/-7.89 |
| chr10:98917635 | SLIT1 | exon | inter | -9.39 | 1.37E-04 | 53.12+/-4.89 | 59.56+/-6.59 |
| chr10:98917281 | SLIT1 | exon | inter | -5.62 | 5.63E-04 | 80.98+/-4.68 | 86.21+/-3.61 |
| chr10:98917565 | SLIT1 | intron | inter | -9.36 | 6.06E-04 | 46.57+/-4.03 | 53.12+/-8.09 |
| chr10:98946589 | SLIT1 | promoter | shores | 6.56 | 6.48E-03 | 52.15+/-8.45 | 44.67+/-9.97 |
| chr10:98823962 | SLIT1 | exon, CDS | inter | -5.48 | 1.30E-02 | 63.52+/-6.28 | 69.59+/-10.86 |
| chr10:98917613 | SLIT1 | exon | inter | -6.64 | 4.26E-02 | 62.1+/-7.43 | 66.17+/-7.22 |
| chr13:84457671 | SLITRK1 | promoter | shelves | -5.97 | 6.55E-15 | 10.35+/-4.07 | 15.27+/-11.7 |
| chr13:84452522 | SLITRK1 | exon, first_exon, UTR | shores | -5.88 | 8.22E-07 | 61.37+/-11.68 | 63.06+/-14.25 |
| chr13:84454251 | SLITRK1 | exon, first_exon, CDS | shores | -5.69 | 3.23E-05 | 7.48+/-5.31 | 12.29+/-9.22 |
| chr4:90646676 | SNCA | exon, UTR | inter | 6.15 | 2.71E-12 | 96.33+/-2.19 | 91.07+/-13.83 |
| chr8:22432297 | SORBS3 | exon, CDS | shelves | 5.54 | 1.87E-02 | 49.28+/-13.43 | 43.46+/-11.94 |
| chr19:41012190 | SPTBN4 | exon, CDS | inter | -24.66 | 2.44E-27 | 42.64+/-25.31 | 47.9+/-12.3 |
| chr19:41009787 | SPTBN4 | exon, CDS | inter | 8.70 | 2.71E-18 | 91.34+/-3.36 | 83.67+/-10.71 |
| chr19:41062006 | SPTBN4 | exon, CDS | shores | 6.49 | 3.39E-10 | 90.43+/-7.89 | 84.59+/-10 |
| chr19:41060957 | SPTBN4 | exon | shores | -10.91 | 1.53E-09 | 44.57+/-10.68 | 55.22+/-8.42 |
| chr19:41008826 | SPTBN4 | exon, CDS | inter | 8.23 | 2.87E-09 | 60.18+/-12.04 | 54.26+/-12.48 |
| chr19:41060622 | SPTBN4 | exon | shores | 7.18 | 6.20E-07 | 79.82+/-6.92 | 75.99+/-10.62 |
| chr19:41008730 | SPTBN4 | exon, CDS | inter | 7.39 | 1.55E-06 | 57.97+/-9.17 | 48.53+/-8.32 |
| chr19:40996006 | SPTBN4 | exon, CDS | islands | 7.19 | 2.92E-06 | 89.87+/-3.55 | 81.88+/-8.18 |
| chr19:41008715 | SPTBN4 | exon, CDS | inter | 6.49 | 1.09E-05 | 78.29+/-8.74 | 69.22+/-9.77 |
| chr19:41081449 | SPTBN4 | exon | shores | -5.59 | 7.67E-05 | 87.45+/-7.59 | 85.5+/-15.15 |
| chr19:41025975 | SPTBN4 | exon, CDS | islands | 11.35 | 2.62E-03 | 42.71+/-16.62 | 35.27+/-12.6 |
| chr19:41038578 | SPTBN4 | exon | shelves | -6.29 | 3.48E-03 | 87.8+/-6.62 | 93.26+/-4.85 |
| chr19:41077529 | SPTBN4 | promoter | shelves | -6.20 | 4.16E-03 | 86.91+/-12.27 | 93.4+/-3.64 |
| chr19:41019435 | SPTBN4 | exon, CDS, first_exon | islands | -7.08 | 4.36E-03 | 68.49+/-7.98 | 76.28+/-9.21 |
| chr19:40996026 | SPTBN4 | exon, CDS | islands | 5.89 | 5.64E-03 | 70.93+/-11.92 | 62.01+/-11.4 |
| chr19:41008745 | SPTBN4 | exon, CDS | inter | 5.97 | 6.38E-03 | 40.18+/-11.66 | 33.27+/-7.31 |
| chr19:40995994 | SPTBN4 | exon, CDS | islands | 5.28 | 8.14E-03 | 78.8+/-4.98 | 73.99+/-11.08 |
| chr19:41026029 | SPTBN4 | exon, CDS | islands | -7.65 | 8.51E-03 | 69.22+/-12.74 | 76.69+/-8.96 |
| chr19:41019099 | SPTBN4 | exon, CDS, first_exon | islands | 8.07 | 1.02E-02 | 21.93+/-10.13 | 20.33+/-10.56 |
| chr19:41019259 | SPTBN4 | exon, CDS, first_exon | islands | 8.89 | 1.18E-02 | 24.12+/-11.71 | 24.29+/-6.37 |
| chr19:41019369 | SPTBN4 | exon, CDS, first_exon | islands | -6.86 | 4.73E-02 | 54.39+/-13.09 | 64.38+/-8.65 |
| chr19:41019193 | SPTBN4 | exon, CDS, first_exon | islands | 9.20 | 4.77E-02 | 38.33+/-10.78 | 32.54+/-11.94 |
| chr6:32795705 | TAP2 | exon, UTR | inter | -37.10 | 1.11E-135 | 60.92+/-24.77 | 90.26+/-13.6 |
| chr6:32795981 | TAP2 | exon, UTR | inter | 8.12 | 2.69E-39 | 91.58+/-4.38 | 85.61+/-17.44 |
| chr6:32800412 | TAP2 | exon, first_exon | inter | -5.20 | 5.15E-05 | 59.09+/-21.08 | 63.68+/-15.16 |
| chr6:32798547 | TAP2 | promoter | inter | 6.86 | 5.04E-04 | 95.46+/-1.74 | 87.71+/-16.54 |
| chr6:32796056 | TAP2 | exon, UTR | inter | 11.53 | 2.35E-03 | 79.81+/-35.22 | 78.48+/-30.7 |
| chr6:32794178 | TAP2 | exon, UTR | inter | -6.38 | 1.78E-02 | 65.42+/-7.23 | 69.81+/-4.92 |
| chr6:32800427 | TAP2 | exon, first_exon | inter | -5.37 | 3.32E-02 | 89.44+/-22.34 | 97.24+/-1.87 |
| chr6:32796792 | TAP2 | exon | inter | 7.29 | 3.91E-02 | 93.77+/-8.35 | 87.15+/-22.54 |
| chr1:119426303 | TBX15 | exon, UTR | inter | 5.50 | 5.91E-05 | 73.79+/-10.36 | 69.31+/-10.42 |
| chr1:119533482 | TBX15 | promoter | shores | 6.60 | 8.36E-04 | 56.07+/-11.8 | 45.56+/-9.54 |
| chr6:31542882 | TNF | promoter | inter | -9.80 | 4.71E-03 | 51.49+/-8.28 | 58.25+/-11.89 |
| chr6:31545721 | TNF | exon, UTR | shelves | -7.48 | 1.26E-02 | 69.42+/-9.49 | 66.37+/-11.15 |
| chr6:31543100 | TNF | promoter | inter | 11.03 | 1.78E-02 | 86.03+/-15.36 | 78.14+/-19.43 |
| chr6:32029204 | TNXB | exon, CDS | inter | -18.56 | 2.06E-16 | 85.11+/-20.62 | 85.64+/-20.25 |
| chr6:32032628 | TNXB | exon, CDS | inter | -5.78 | 3.22E-11 | 92.44+/-11.78 | 96.93+/-1.94 |
| chr6:32064268 | TNXB | exon | islands | 12.81 | 9.69E-08 | 29.71+/-16.1 | 18.7+/-6.76 |
| chr6:32064098 | TNXB | exon | islands | 18.06 | 5.94E-07 | 46.24+/-18.5 | 33.58+/-11.58 |
| chr6:32064246 | TNXB | exon | islands | 11.29 | 2.57E-06 | 46.74+/-19.36 | 43.26+/-12.39 |
| chr6:32016405 | TNXB | exon, CDS | inter | -8.19 | 5.64E-06 | 30.05+/-13.62 | 29.36+/-7.48 |
| chr6:32035694 | TNXB | exon, CDS | inter | -12.20 | 6.37E-05 | 85.4+/-19.69 | 85+/-19.18 |
| chr6:32064258 | TNXB | exon | islands | 10.29 | 1.50E-04 | 38.53+/-17.07 | 33.51+/-11.66 |
| chr6:32016394 | TNXB | exon, CDS | inter | -8.97 | 1.51E-04 | 25.3+/-9.62 | 29.83+/-10.12 |
| chr6:32064024 | TNXB | exon | islands | 16.45 | 2.12E-04 | 44.94+/-19.34 | 31.49+/-14.55 |
| chr6:32049423 | TNXB | exon, CDS | shelves | 26.15 | 2.14E-04 | 75.03+/-30.76 | 69.81+/-32.07 |
| chr6:32064239 | TNXB | exon | islands | 10.26 | 2.61E-04 | 47.94+/-21.74 | 47.85+/-16.57 |
| chr6:32017242 | TNXB | exon, CDS | inter | 6.78 | 2.67E-04 | 81.93+/-29.22 | 84.93+/-26.1 |
| chr6:32064334 | TNXB | exon | islands | 10.00 | 3.17E-04 | 24.58+/-14.4 | 18.08+/-7.43 |
| chr6:32064125 | TNXB | exon | islands | 14.28 | 3.27E-04 | 41.21+/-17.46 | 30.97+/-11.21 |
| chr6:32064339 | TNXB | exon | islands | 10.96 | 8.86E-04 | 31.22+/-15.62 | 24.79+/-11.29 |
| chr6:32015651 | TNXB | exon, CDS | inter | 5.76 | 9.62E-04 | 88.12+/-4.84 | 78.95+/-7.68 |
| chr6:32064345 | TNXB | exon | islands | 10.03 | 1.35E-03 | 22.08+/-11.04 | 14.93+/-8.43 |
| chr6:32016360 | TNXB | exon, CDS | inter | -6.94 | 2.35E-03 | 31.38+/-13.6 | 33.43+/-12.09 |
| chr6:32013855 | TNXB | intron | inter | -10.57 | 2.51E-03 | 71.58+/-7.22 | 74.89+/-17.23 |
| chr6:32061084 | TNXB | exon, CDS | shelves | -8.03 | 3.65E-03 | 59.81+/-8.19 | 64.98+/-7.96 |
| chr6:32016378 | TNXB | exon, CDS | inter | -7.78 | 4.30E-03 | 49.87+/-11.86 | 51.02+/-10.53 |
| chr6:32064660 | TNXB | exon | islands | 11.98 | 5.97E-03 | 25.42+/-14.39 | 14.84+/-8.44 |
| chr6:32016372 | TNXB | exon, CDS | inter | -6.48 | 6.48E-03 | 39.82+/-13.57 | 39.65+/-11.18 |
| chr6:32016426 | TNXB | exon, CDS | inter | -7.80 | 1.01E-02 | 62.71+/-13.61 | 62.69+/-8.9 |
| chr6:32064305 | TNXB | exon | islands | 5.69 | 1.01E-02 | 15.82+/-9.79 | 15.26+/-7.39 |
| chr6:32064153 | TNXB | exon | islands | 11.98 | 1.08E-02 | 63.32+/-17.29 | 53.46+/-12.39 |
| chr6:32064639 | TNXB | exon | islands | 9.37 | 1.17E-02 | 26.79+/-16.45 | 19.87+/-6.13 |
| chr6:32013845 | TNXB | intron | inter | -9.91 | 1.20E-02 | 73.91+/-6.39 | 76.13+/-14.24 |
| chr6:32064320 | TNXB | exon | islands | 8.07 | 1.22E-02 | 15.67+/-12.94 | 8.4+/-4.84 |
| chr6:32064255 | TNXB | exon | islands | 7.71 | 1.26E-02 | 23.92+/-9.77 | 22.09+/-8.39 |
| chr6:32064318 | TNXB | exon | islands | 10.63 | 1.42E-02 | 28.78+/-19.81 | 20.2+/-8.03 |
| chr6:32082822 | TNXB | exon, UTR, first_exon | inter | -6.88 | 2.16E-02 | 77.54+/-9.47 | 74.69+/-10.26 |
| chr6:32064117 | TNXB | exon | islands | 12.42 | 2.28E-02 | 39.59+/-21.71 | 24.42+/-11.62 |
| chr6:32064123 | TNXB | exon | islands | 12.00 | 2.75E-02 | 37.87+/-7.77 | 27.93+/-11.57 |
| chr6:32064732 | TNXB | exon | islands | 9.88 | 4.02E-02 | 26.85+/-20.11 | 18.12+/-9.36 |
| chr6:32064332 | TNXB | exon | islands | 6.41 | 4.21E-02 | 18.19+/-7.11 | 15.47+/-6.45 |
| chr6:32082841 | TNXB | exon, UTR, first_exon | inter | -7.32 | 4.30E-02 | 69.02+/-9.9 | 67.9+/-9.9 |
| chr6:32064377 | TNXB | exon | islands | 9.06 | 4.54E-02 | 19.78+/-14.28 | 13.12+/-7.67 |
| chr6:41130871 | TREM2 | exon, UTR, first_exon | inter | 7.03 | 2.57E-03 | 21.23+/-6.61 | 17.59+/-10.03 |
| chr6:41129207 | TREM2 | exon, CDS | inter | -9.44 | 1.32E-02 | 67.81+/-14.17 | 63.83+/-13.8 |
| chr6:41129194 | TREM2 | exon, CDS | inter | -10.41 | 1.51E-02 | 67.98+/-9.62 | 67.87+/-13.34 |
| chr6:41131011 | TREM2 | promoter | inter | 9.72 | 1.73E-02 | 36.41+/-16.1 | 35.73+/-9.36 |
| chr6:30103745 | TRIM40 | promoter | inter | 26.27 | 1.58E-40 | 89.98+/-11.52 | 71.28+/-22.47 |
| chr6:30116341 | TRIM40 | exon, UTR | inter | 25.14 | 4.92E-38 | 90.88+/-7.87 | 71.76+/-21.24 |
| chr6:30114955 | TRIM40 | exon, CDS | inter | 26.62 | 9.26E-29 | 91.5+/-5.61 | 69.98+/-25.79 |
| chr6:30103840 | TRIM40 | promoter | inter | 22.82 | 6.25E-28 | 81.92+/-18.45 | 65.82+/-20.78 |
| chr6:30104295 | TRIM40 | promoter | inter | -9.26 | 1.17E-02 | 54.57+/-14.16 | 55.07+/-12.47 |
| chr6:30104807 | TRIM40 | exon, UTR, first_exon | inter | 7.69 | 1.59E-02 | 48.17+/-18.45 | 34.46+/-13.11 |
| chr6:30103699 | TRIM40 | promoter | inter | -8.72 | 2.97E-02 | 34.17+/-10.56 | 32.03+/-11.08 |
| chr11:5617200 | TRIM6 | promoter | inter | 6.02 | 6.09E-08 | 66.21+/-16.11 | 57.07+/-15.96 |
| chr11:5617202 | TRIM6 | promoter | inter | 6.74 | 8.81E-08 | 89.72+/-6.52 | 79.34+/-9.2 |
| chr11:5617162 | TRIM6 | promoter | inter | 7.51 | 1.36E-04 | 80.42+/-14.22 | 71.74+/-14.87 |
| chr11:5617146 | TRIM6 | promoter | inter | 7.23 | 8.35E-03 | 74.28+/-15.53 | 67.98+/-12.38 |
| chr2:71126346 | VAX2 | promoter | shores | 9.49 | 2.61E-07 | 25.51+/-10.63 | 14.5+/-3.58 |
| chr19:9489132 | ZNF177 | intron | inter | 23.14 | 2.65E-22 | 51.57+/-27.32 | 28.06+/-37.67 |
| chr19:9492141 | ZNF177 | intron | inter | 23.00 | 2.16E-17 | 51.56+/-26.05 | 27.58+/-38.33 |
| chr19:9490814 | ZNF177 | exon, CDS | inter | 22.99 | 2.57E-07 | 46.68+/-27.42 | 27.6+/-39.71 |
| chr19:9434101 | ZNF177 | promoter | shores | 9.25 | 1.95E-02 | 83.68+/-13.25 | 80.49+/-13.13 |
| chr19:9473818 | ZNF177 | exon, UTR, first_exon | islands | 5.15 | 2.61E-02 | 10.69+/-3.92 | 5.99+/-5.97 |
| chr6:30022577 | ZNRD1-AS1 | exon | inter | 13.05 | 3.71E-29 | 94.49+/-1.76 | 83.42+/-19.8 |
| chr6:30023868 | ZNRD1-AS1 | exon | inter | -10.85 | 8.47E-20 | 38.18+/-22.68 | 46.37+/-25.76 |
| chr6:30002859 | ZNRD1-AS1 | exon | inter | 13.20 | 1.07E-18 | 96.1+/-3.2 | 85.28+/-21.1 |
| chr6:29988641 | ZNRD1-AS1 | intron | inter | -6.23 | 7.35E-17 | 52.18+/-19.08 | 67.04+/-15.57 |
| chr6:29969794 | ZNRD1-AS1 | exon | inter | 10.86 | 8.68E-10 | 85.61+/-7.07 | 78.14+/-8.87 |
| chr6:29984251 | ZNRD1-AS1 | exon | inter | 15.08 | 6.63E-06 | 87.22+/-16.29 | 69.97+/-23.21 |
| chr6:30002723 | ZNRD1-AS1 | exon | inter | 14.53 | 1.41E-04 | 66.35+/-5.22 | 62.27+/-15.61 |
| chr6:30024677 | ZNRD1-AS1 | exon | inter | 12.94 | 3.06E-02 | 79.93+/-21.42 | 67.24+/-24.15 |

**Supplementary table 5:** 22 CpG segments and 2 DMRs identified in our plasma study of Alzheimer’s disease. The longest transcript is bold, a slash indicates that two genes overlap the segment and an asterisk indicates that this segment overlapped partially region identified. The two segments of *DUP22* gene overlap two DMRs: chr6:291686-293332 identified in the superior temporal gyrus [13] and chr6:291687-292823 identified in the hippocampus, entorhinal cortex, dorsolateral prefrontal cortex and cerebellum [33][.](#_bookmark53) The CpG segment and the DMR of the *MBP* gene overlap two DMRs identified on cortical pyramidal layers (chr18:74799500-74799572) [11] and on the pre-frontal cortex (chr18:74799495-74799572)[34][.](#_bookmark51)

| **Chromosomal  region** | **Gene** | **Region  annotation** | **CpG  site** | **Mean Methylation  variation (%)** | **Mean case  Methylation (%)** | **Mean control  Methylation (%)** | **CpGs** | **Length  (bp)** | **Analysis** |
| --- | --- | --- | --- | --- | --- | --- | --- | --- | --- |
| chr8:41583290-41585437 | *ANK1* | **exon, intron** | islands | 4.79 | 38.76 +/-11.76 | 37.76 +/-8.82 | 22 | 2148 | Segment |
| chr8:41518645-41519053 | *ANK1* | exon, **intron** | inter | -6.03 | 53.36 +/-3.46 | 54.95 +/-5.69 | 11 | 409 | Segment |
| chr10:73498516-73499071 | *C10orf105/CDH23* | **promoter/intron** | inter | 6.89 | 74.94 +/-5.1 | 74.72 +/-8.95 | 15 | 556 | Segment |
| chr10:73472315-73472882 | *C10orf105/CDH23* | **exon/exon**, promoter, **intron** | inter | 6.25 | 48.79 +/-7.5 | 49.77 +/-5.88 | 14 | 568 | Segment |
| chr6:292165-304636 * | *DUSP22* | **exon**, promoter, **intron** | islands | 10.54 | 50.95 +/-21.78 | 44.49 +/-18.91 | 36 | 12472 | Segment |
| chr6:290180-292163 * | *DUSP22* | **exon, promoter**, intron | islands | 4.11 | 53.79 +/-13.8 | 52.1 +/-10.58 | 26 | 1984 | Segment |
| chr12:133084805-133087421 | *FBRSL1* | **exon, intron** | inter | -5.47 | 90.82 +/-8.19 | 92.74 +/-6.44 | 92 | 2617 | Segment |
| chr6:32063949-32064764 | *TNXB* | **exon** | islands | 7.70 | 29.83 +/-13.59 | 23.78 +/-6.12 | 87 | 816 | Segment |
| chr19:13409367-13409931 | *CACNA1A* | **exon** | islands | -9.02 | 34.45 +/-17.28 | 38.86 +/-15.76 | 43 | 565 | Segment |
| chr19:18888093-18889147 | *CRTC1* | **exon** | islands | -11.95 | 73.18 +/-15.23 | 75.3 +/-11.47 | 40 | 1055 | Segment |
| chr17:44103258-44105340 | *MAPT* | **exon** | inter | 9.90 | 50.17 +/-5.19 | 48.86 +/-10.65 | 31 | 2083 | Segment |
| chr13:67800487-67802706 | *PCDH9* | **exon**, promoter | shores | -4.10 | 67.13 +/-8.22 | 68.57 +/-5.56 | 26 | 2220 | Segment |
| chr22:50582666-50588008 | *MOV10L1* | **exon**, promoter, **intron** | inter | 4.13 | 69.88 +/-2 | 66.68 +/-2.64 | 18 | 5343 | Segment |
| chr18:74799320-74807414* | *MBP* | exon, promoter, **intron** | islands | 16.34 | 82.25 +/-4.72 | 70.64 +/-11.78 | 17 | 8095 | Segment |
| chr7:155266903-155294428 | *CNPY1* | **exon, intron** | islands | -6.18 | 60.14 +/-6.11 | 62.86 +/-3.7 | 13 | 27526 | Segment |
| chr19:41197384-41197984 | *NUMBL* | **promoter** | shores | -6.10 | 65.13 +/-5.21 | 66.76 +/-6.02 | 13 | 601 | Segment |
| chr4:6107207-6107320 | *JAKMIP1* | exon, intron | islands | 8.34 | 61.65 +/-6.89 | 57.76 +/-11.34 | 12 | 114 | Segment |
| chr1:29189738-29189864 | *OPRD1* | **exon** | islands | -4.55 | 85.06 +/-9.12 | 90.17 +/-4.73 | 12 | 127 | Segment |
| chr10:45919511-45923837 | *ALOX5* | **exon,** promoter, **intron** | islands | 4.66 | 52.97 +/-6.46 | 49.73 +/-6.63 | 10 | 4327 | Segment |
| chr21:27372461-27423473 | *APP* | **exon**, promoter, i**ntron** | inter | -3.08 | 75.54 +/-7.62 | 74.95 +/-6.74 | 10 | 51013 | Segment |
| chr1:46859479-46859780 | *FAAH* | **promoter** | islands | 5.02 | 60.78 +/-5.64 | 58.7 +/-6.04 | 10 | 302 | Segment |
| chr5:146434146-146460640 | *PPP2R2B* | **exon**, promoter, **intron** | inter | 4.55 | 61.51 +/-6.3 | 57.34 +/-5.05 | 10 | 26495 | Segment |
| chr18:74799371-74799575* | *MBP* | **intron,** promoter | islands | 6,19 | 86.69 +/-5.14 | 73.6 +/-12.3 | 15 | 205 | DMR |
| chr12:133085873-133086836 | *FBRSL1* | **intron, exon** | inter | -5,01 | 90.93 +/-9.24 | 92.99 +/-7.21 | 61 | 964 | DMR |

**Reference**

1. Kaut O, Ramirez A, Pieper H, Schmitt I, Jessen F, Wüllner U. DNA methylation of the TNF-$\alpha$ promoter region in peripheral blood monocytes and the cortex of human Alzheimer's disease patients*.* *Dementia and geriatric cognitive disorders* 38(1-2), 10-15 (2014).

2. Bakulski KM, Dolinoy DC, Sartor MA *et al*. Genome-wide DNA methylation differences between late-onset Alzheimer's disease and cognitively normal controls in human frontal cortex*.* *Journal of Alzheimer's Disease* 29(3), 571-588 (2012).

3. Rao JS, Keleshian VL, Klein S, Rapoport SI. Epigenetic modifications in frontal cortex from Alzheimer's disease and bipolar disorder patients*.* *Translational psychiatry* 2(7), e132 (2012).

4. Sanchez-Mut JV, Aso E, Panayotis N *et al*. DNA methylation map of mouse and human brain identifies target genes in Alzheimer’s disease*.* *Brain* 136(10), 3018-3027 (2013).

5. Foraker J, Millard SP, Leong L *et al*. The APOE gene is differentially methylated in Alzheimer’s Disease*.* *Journal of Alzheimer's Disease* 48(3), 745-755 (2015).

6. D’addario C, Candia SB, Arosio B *et al*. Transcriptional and epigenetic phenomena in peripheral blood cells of monozygotic twins discordant for alzheimer’s disease, a case report*.* *Journal of the neurological sciences* 372 211-216 (2017).

7. Ellison EM, Bradley-Whitman MA, Lovell MA. Single-base resolution mapping of 5-hydroxymethylcytosine modifications in hippocampus of Alzheimer’s disease subjects*.* *Journal of Molecular Neuroscience* 63(2), 185-197 (2017).

8. De Jager PL, Srivastava G, Lunnon K *et al*. Alzheimer's disease: early alterations in brain DNA methylation at ANK1, BIN1, RHBDF2 and other loci*.* *Nature neuroscience* 17(9), 1156-1163 (2014).

9. Nazarian A, Yashin AI, Kulminski AM. Methylation-wide association analysis reveals AIM2, DGUOK, GNAI3, and ST14 genes as potential contributors to the Alzheimer’s disease pathogenesis*.* *bioRxiv* doi:10.1101/322503 322503 (2018).

10. Lunnon K, Smith R, Hannon E *et al*. Methylomic profiling implicates cortical deregulation of ANK1 in Alzheimer's disease*.* *Nature neuroscience* 17(9), 1164-1170 (2014).

11. Hernández HG, Sandoval-Hernández AG, Garrido-Gil P *et al*. Alzheimer's disease DNA methylome of pyramidal layers in frontal cortex: laser-assisted microdissection study*.* *Epigenomics* 10(11), 1365-1382 (2018).

12. Smith AR, Smith RG, Condliffe D *et al*. Increased DNA methylation near TREM2 is consistently seen in the superior temporal gyrus in Alzheimer's disease brain*.* *Neurobiol Aging* 47 35-40 (2016).

13. Watson CT, Roussos P, Garg P *et al*. Genome-wide DNA methylation profiling in the superior temporal gyrus reveals epigenetic signatures associated with Alzheimer’s disease*.* *Genome medicine* 8(1), 5 (2016).

14. Iwata A, Nagata K, Hatsuta H *et al*. Altered CpG methylation in sporadic Alzheimer's disease is associated with APP and MAPT dysregulation*.* *Human molecular genetics* 23(3), 648-656 (2013).

15. Siegmund KD, Connor CM, Campan M *et al*. DNA methylation in the human cerebral cortex is dynamically regulated throughout the life span and involves differentiated neurons*.* *PloS one* 2(9), e895 (2007).

16. Pai M-C, Kuo Y-M, Wang IF, Chiang P-M, Tsai K-J. The role of methylated circulating nucleic acids as a potential biomarker in Alzheimer’s disease*.* *Molecular neurobiology* 56(4), 2440-2449 (2019).

17. D'addario C, Di Francesco A, Arosio B *et al*. Epigenetic regulation of fatty acid amide hydrolase in Alzheimer disease*.* *PloS one* 7(6), e39186 (2012).

18. Hou Y, Chen H, He Q *et al*. Changes in methylation patterns of multiple genes from peripheral blood leucocytes of Alzheimer's disease patients*.* *Acta neuropsychiatrica* 25(2), 66-76 (2013).

19. Yoshino Y, Mori T, Yoshida T *et al*. Elevated mRNA expression and low methylation of SNCA in Japanese Alzheimer’s disease subjects*.* *Journal of Alzheimer's Disease* 54(4), 1349-1357 (2016).

20. Piaceri I, Raspanti B, Tedde A, Bagnoli S, Sorbi S, Nacmias B. Epigenetic modifications in Alzheimer's disease: cause or effect? *Journal of Alzheimer's Disease* 43(4), 1169-1173 (2015).

21. Wang Y, Xu S, Cao Y *et al*. Folate deficiency exacerbates apoptosis by inducing hypomethylation and resultant overexpression of DR4 together with altering DNMTs in Alzheimer’s disease*.* *International journal of clinical and experimental medicine* 7(8), 1945 (2014).

22. Di Francesco A, Arosio B, Gussago C *et al*. Involvement of 5-lipoxygenase in Alzheimer's disease: a role for DNA methylation*.* *Journal of Alzheimer's Disease* 37(1), 3-8 (2013).

23. Nagata T, Kobayashi N, Ishii J *et al*. Association between DNA Methylation of the BDNF Promoter Region and Clinical Presentation in Alzheimer's Disease*.* *Dement Geriatr Cogn Dis Extra* 5(1), 64-73 (2015).

24. Madrid A, Hogan KJ, Papale LA *et al*. DNA hypomethylation in blood links B3GALT4 and ZADH2 to Alzheimer’s disease*.* *Journal of Alzheimer's Disease* 66(3), 927-934 (2018).

25. Arosio B, Bulbarelli A, Candia SB *et al*. Pin1 contribution to Alzheimer’s disease: transcriptional and epigenetic mechanisms in patients with late-onset Alzheimer’s disease*.* *Neurodegenerative Diseases* 10(1-4), 207-211 (2012).

26. Chang L, Wang Y, Ji H *et al*. Elevation of peripheral BDNF promoter methylation links to the risk of Alzheimer's disease*.* *PloS one* 9(11), e110773 (2014).

27. Ji H, Wang Y, Jiang D *et al*. Elevated DRD4 promoter methylation increases the risk of Alzheimer's disease in males*.* *Molecular medicine reports* 14(3), 2732-2738 (2016).

28. Ji H, Wang Y, Liu G *et al*. Elevated OPRD1 promoter methylation in Alzheimer’s disease patients*.* *PloS one* 12(3), e0172335 (2017).

29. Konki M, Lindgren N, Kylaniemi M *et al*. Plasma cell-free DNA methylation marks for episodic memory impairment: a pilot twin study*.* *Scientific reports* 10(1), 14192 (2020).

30. Sung HY, Choi BO, Jeong JH, Kong KA, Hwang J, Ahn JH. Amyloid Beta-Mediated Hypomethylation of Heme Oxygenase 1 Correlates with Cognitive Impairment in Alzheimer's Disease*.* *PloS one* 11(4), e0153156 (2016).

31. Davies MN, Volta M, Pidsley R *et al*. Functional annotation of the human brain methylome identifies tissue-specific epigenetic variation across brain and blood*.* *Genome biology* 13(6), R43 (2012).

32. Ghosh S, Yates AJ, Frühwald MC, Miecznikowski JC, Plass C, Smiraglia D. Tissue specific DNA methylation of CpG islands in normal human adult somatic tissues distinguishes neural from non-neural tissues*.* *Epigenetics* 5(6), 527-538 (2010).

33. Semick SA, Bharadwaj RA, Collado-Torres L *et al*. Integrated DNA methylation and gene expression profiling across multiple brain regions implicate novel genes in Alzheimer’s disease*.* *Acta neuropathologica* 137(4), 557-569 (2019).

34. Zhang L, Silva TC, Young JI *et al*. Epigenome-wide meta-analysis of DNA methylation differences in prefrontal cortex implicates the immune processes in Alzheimer’s disease*.* *Nature communications* 11(1), 1-13 (2020).
